# Supplementary material for: Direct Interactions with Nascent Transcripts Is Potentially a Common Targeting Mechanism of Long Non-Coding RNAs
Source: MDPI journal article supplement (doi:10.3390/genes11121483), 2020-12-10

# All Chromosomes

Query population : 2667  
Reference population : 1243  
Relative Ks p-value : 1.43985e-12  
Relative ecdf deviation area : 0.0215167  
Relative ecdf area correlation : 0.0862894  
Relative ecdf deviation area p-value : <0.01  
Scaled Absolute min. distance p-value : <0.01  
Scaled Absolute min. lower tail : TRUE  
Jaccard Measure p-value : 0.1  
Jaccard Measure lower tail : FALSE  
Projection test p-value : 0.00388599  
Projection test lower tail : FALSE  
Projection test observed to expected ratio : 11.0042

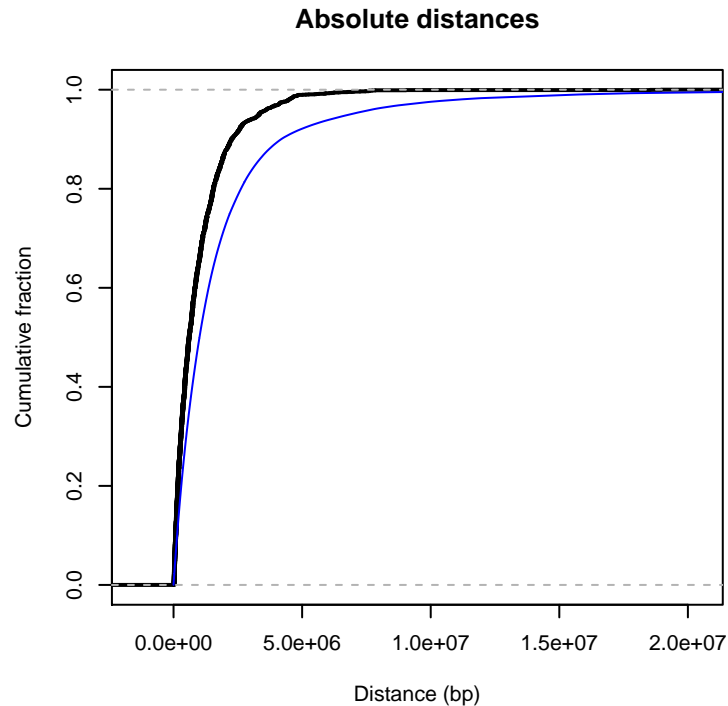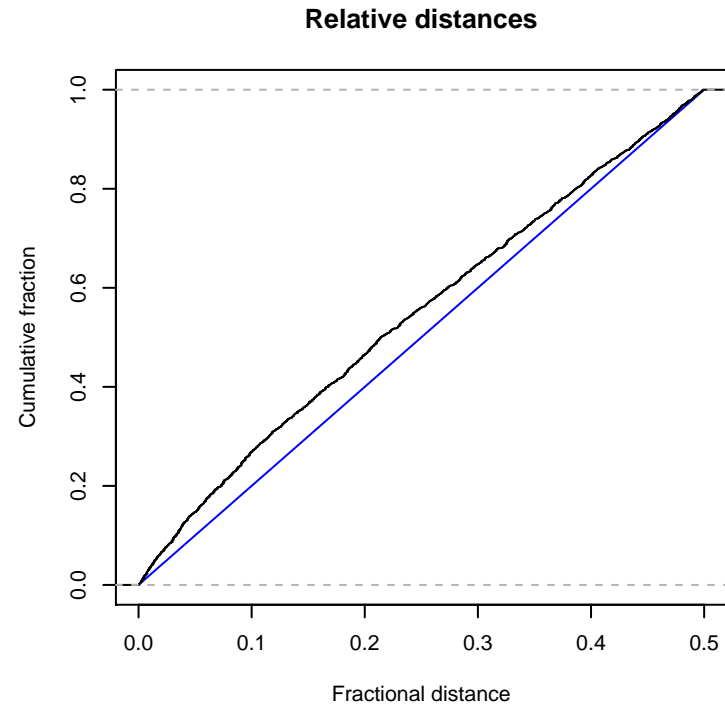

Supplement: s1 [file s1]
