# Supplementary material for: Direct Interactions with Nascent Transcripts Is Potentially a Common Targeting Mechanism of Long Non-Coding RNAs
Source: MDPI journal article supplement (doi:10.3390/genes11121483), 2020-12-10

# All Chromosomes

Query population : 1668  
Reference population : 1243  
Relative Ks p-value :  $9.52247 \times 10^{-10}$   
Relative ecdf deviation area : 0.0245289  
Relative ecdf area correlation : 0.0986966  
Relative ecdf deviation area p-value :  $<0.01$   
Scaled Absolute min. distance p-value :  $<0.01$   
Scaled Absolute min. lower tail : TRUE  
Jaccard Measure p-value : 0.41  
Jaccard Measure lower tail : TRUE  
Projection test p-value : 0.055251  
Projection test lower tail : FALSE  
Projection test observed to expected ratio : 0

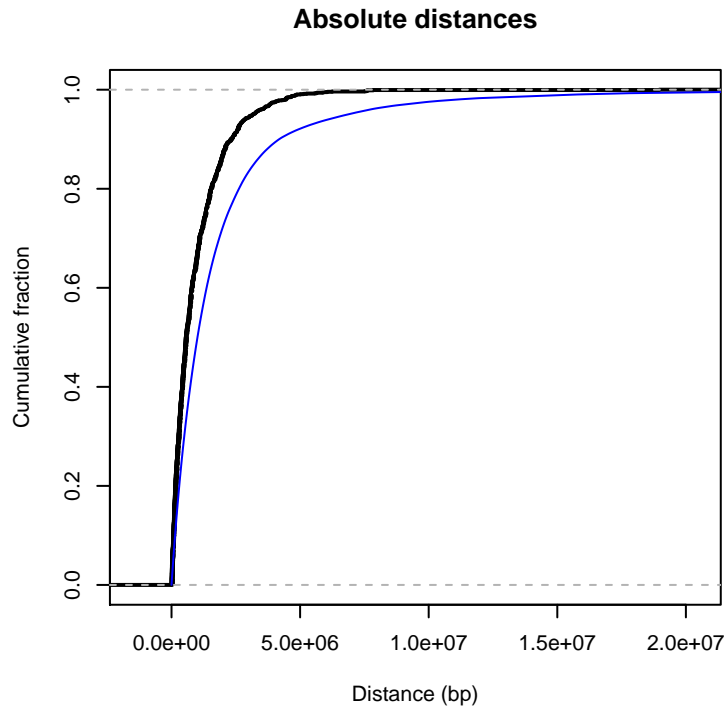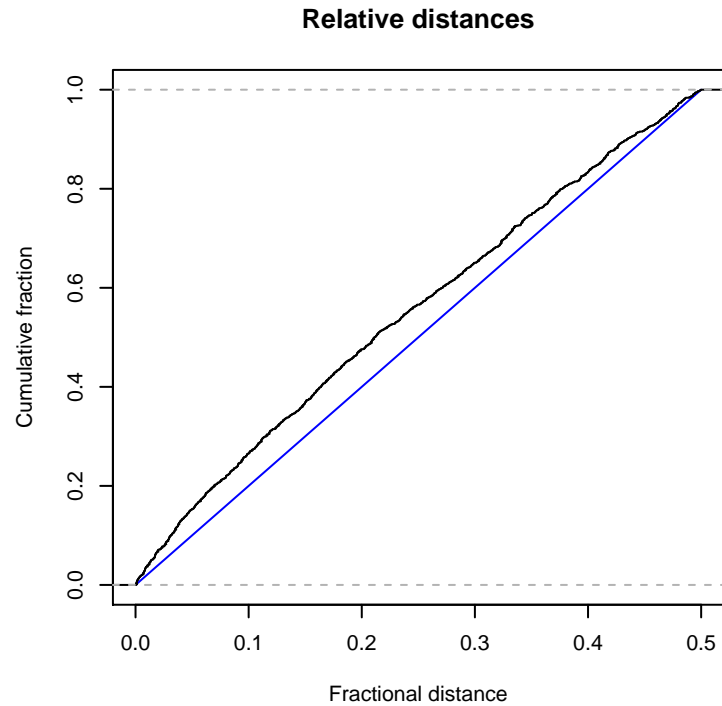

Supplement: s1 [file s1]
