# Supplementary material for: Direct Interactions with Nascent Transcripts Is Potentially a Common Targeting Mechanism of Long Non-Coding RNAs
Source: MDPI journal article supplement (doi:10.3390/genes11121483), 2020-12-10
Supplement: s1 [file s1]

# Post-transcriptional interactions

Total number of ASOs = 333 (47 good)

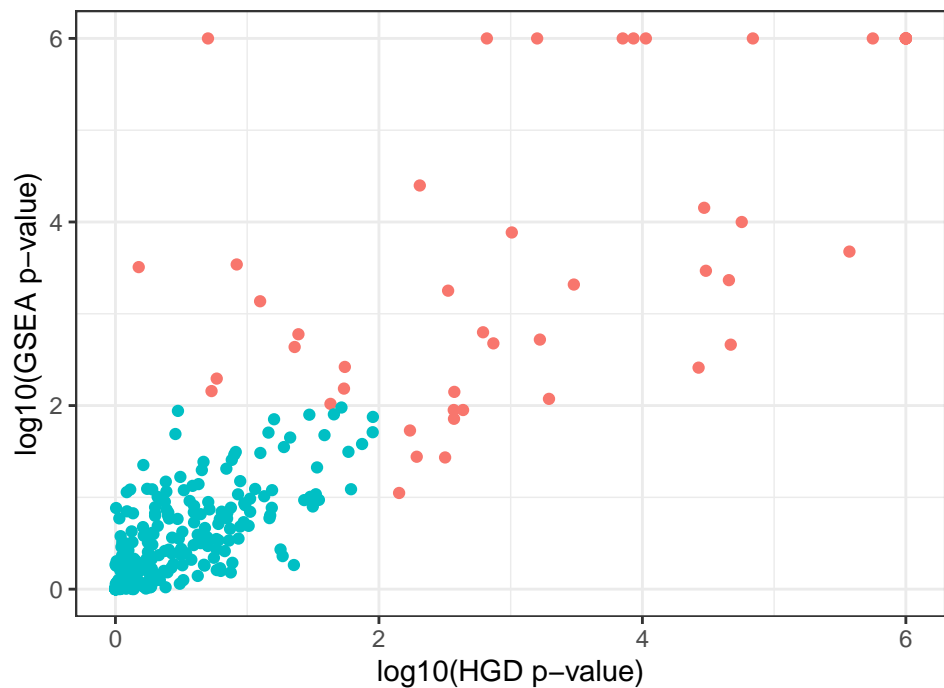

● HGD p-value < 0.01 or GSEA p-value < 0.01

● HGD p-value >= 0.01 and GSEA p-value >= 0.01
