# Supplementary material for: Direct Interactions with Nascent Transcripts Is Potentially a Common Targeting Mechanism of Long Non-Coding RNAs
Source: MDPI journal article supplement (doi:10.3390/genes11121483), 2020-12-10
Supplement: s1 [file s1]

|                                            |                                                                                                                                                                               |
|--------------------------------------------|-------------------------------------------------------------------------------------------------------------------------------------------------------------------------------|
| ENSMUST00000184554.7<br>ENST00000556895.T0 | -----<br>CACCCCGAGCTGTCAGGCGTTCCGCCGCGGCCGCGAGGCCCGCCGGCCGGCGGGGAGCTA                                                                                                         |
| ENSMUST00000184554.7<br>ENST00000556895.T0 | -----<br>CGCCCGGACGGCCAGCAGGCCCGCGGGAGTGGGGCTGCCGCGGCTGAGGCGAGGCGGGCC                                                                                                         |
| ENSMUST00000184554.7<br>ENST00000556895.T0 | -CGCGCG-CGATGTGGGAGCTCGCGGCCGAGCGCCCGGGAGGCCGGGCCACGACGCC<br>GCGCGCGTCGGCGTCACAGCCCGCGGCAGAGGCGCCAGGGCGGCCGGGCCACGACGCC<br>***** ** ** *** ***** * ***** ** *****             |
| ENSMUST00000184554.7<br>ENST00000556895.T0 | CGTGGCTCCGCTGCGGCAGCGGCGGTGCTGGTGTGCGCGCGGCCGGGAGGCGGCTTCGC<br>GAAAGCGCCGCTGCGGTTGCCGCCTCGGAGGC-TCCCCGGGCCCGCGGCTGGACC-C<br>** ***** ** ** * ** ** * ** * ** * ** *           |
| ENSMUST00000184554.7<br>ENST00000556895.T0 | GCCGCGGGCGGGAGGCTGCGGCGGGCGACCCGTCCTGGACACGCGAGGAAGAGCGAGCCG<br>GGCGCGGGCGGGAGGCTCGGGCGGGCGGTCCGGCCCGGG-ACTCGGTTTGGGCGACCAG<br>* ***** ***** ** ** ** ** ** ** ** ** * **** * |
| ENSMUST00000184554.7<br>ENST00000556895.T0 | ATGGCGGCAGGGGCCGCGCTTCGACCCGGTAACCTAGAAGATGATAATTAATGTGGTTGC<br>GAGGTGCCGGTGGCCGCGCTCGGACCCGGTGACTTAAGAGATTAATAATTTGGTTGC<br>** * * * ***** ***** ***** * ***** *****         |
| ENSMUST00000184554.7<br>ENST00000556895.T0 | TGATAATTCTGAATAAATACAG----CTTTTATCCCAGGTGTGCCATTTTGAAGACTGAG<br>TGTTGGTTCTGAACAAATAATGAGTTCTTTATTTGAGGTATGCCATTTTGAAGACTGAG<br>** * ***** ***** * ***** *****                 |
| ENSMUST00000184554.7<br>ENST00000556895.T0 | ACCATAGAGTTCTA-----AGAATAAAGGAAAGAGCCCTTGGGAA-----ATTATTATAT<br>ACGTTGGAGTTTATCCTAGAGGATAAAGGAAA---TCTTTGGGAAAGTCAGTATTTTAT<br>** * ***** ** ** ***** * ***** * **** **       |
| ENSMUST00000184554.7<br>ENST00000556895.T0 | ATAGCAAAAATGTGAATCCTCAGATGGAA-----TGAAAGGCCTGCACCA-----TAGAC<br>ATAGCAAAAATATGAA-CCTCAAACCTGAATCCTCTAAAGGCCCCATACAATGAAGTAGAC<br>***** ***** ***** * ** * ** * ** * *****     |
| ENSMUST00000184554.7<br>ENST00000556895.T0 | ATC----GAAGCATTTAAATTTTTTTCTTCTAATTTTTTATGAAGCACCCCGCTTGAAGA<br>ATTGGTGGAACATTTACACC-----CAGTCAGCTTGAAGA<br>** *** ***** * ** * *****                                         |
| ENSMUST00000184554.7<br>ENST00000556895.T0 | GTTTGAAATGGACTTTACCACTGAGAAATCAAGATGGCAGCCATTATGGGGAATTGAGG<br>GTTTCAAATGGACCTACCACTGAGAAATCAAGATGGCAGTCTACTATGGGGAATTGAGG<br>**** ***** ***** * * *****                      |
| ENSMUST00000184554.7<br>ENST00000556895.T0 | -AAAATGGATTAATGCAAGAATGCTGTAATATTATACAACCAACACAGGATTCTTTTAAT<br>AAAAATGGATTAATACAAGAGTCCTGTGATAATATACAACCAAGACAGGGTTCTTTTAAC<br>***** ***** * **** ** ***** *****             |
| ENSMUST00000184554.7<br>ENST00000556895.T0 | GTGGATTCCATGAAATGAATGA-----TTCTTACCCAACACAAATGGACAGTGGA<br>ATGGATTCCATGCAGTGAATGAAGACATAGGTTTCTTACCCAACACAAATGGACAGTGGA<br>***** * ***** *****                                |
| ENSMUST00000184554.7<br>ENST00000556895.T0 | ATTTACTTCCTAAAGACTTGTTACATGTCATGTACATTTTTGACATCTGGAGAAGACTCT<br>TTTGACTTTCTAAAGACTTTTT-----TTGTGGACA-TTTTGACATTTGGAGAAG-----<br>** **** ***** ** * ** ** ***** *****          |
| ENSMUST00000184554.7<br>ENST00000556895.T0 | ACAATTCTACAAATGGTAGTTTGTATTCTGGAATTTCTTGCAAGTTTGATCTGAAGTGAC<br>-----                                                                                                         |
| ENSMUST00000184554.7<br>ENST00000556895.T0 | CTTATGGAATGTAACTTTAATAAAATCTCTAAACTTAAAAA<br>-----AAAG<br>***                                                                                                                 |
