# Supplementary figures and images for: Direct Interactions with Nascent Transcripts Is Potentially a Common Targeting Mechanism of Long Non-Coding RNAs
Source: MDPI journal article supplement (doi:10.3390/genes11121483), 2020-12-10

# 47 good ASOs

ASSA pvalue < 0.01

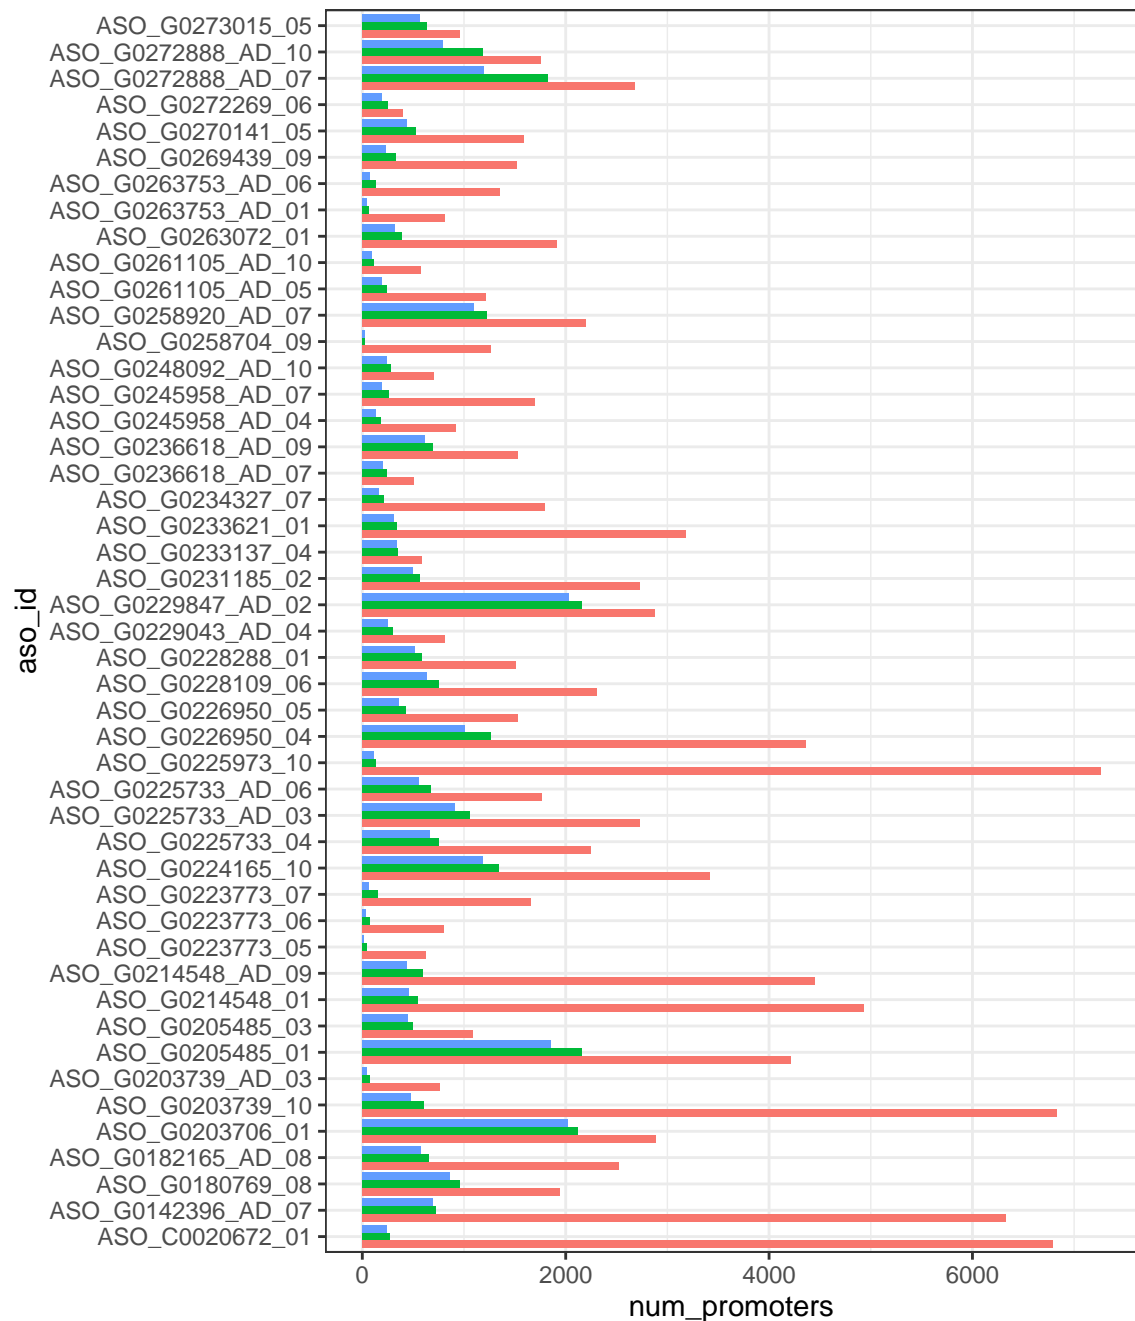

group de\_trxs de\_and\_assa\_hit non\_de\_and\_assa\_hit

Supplement: s1 [file s1]

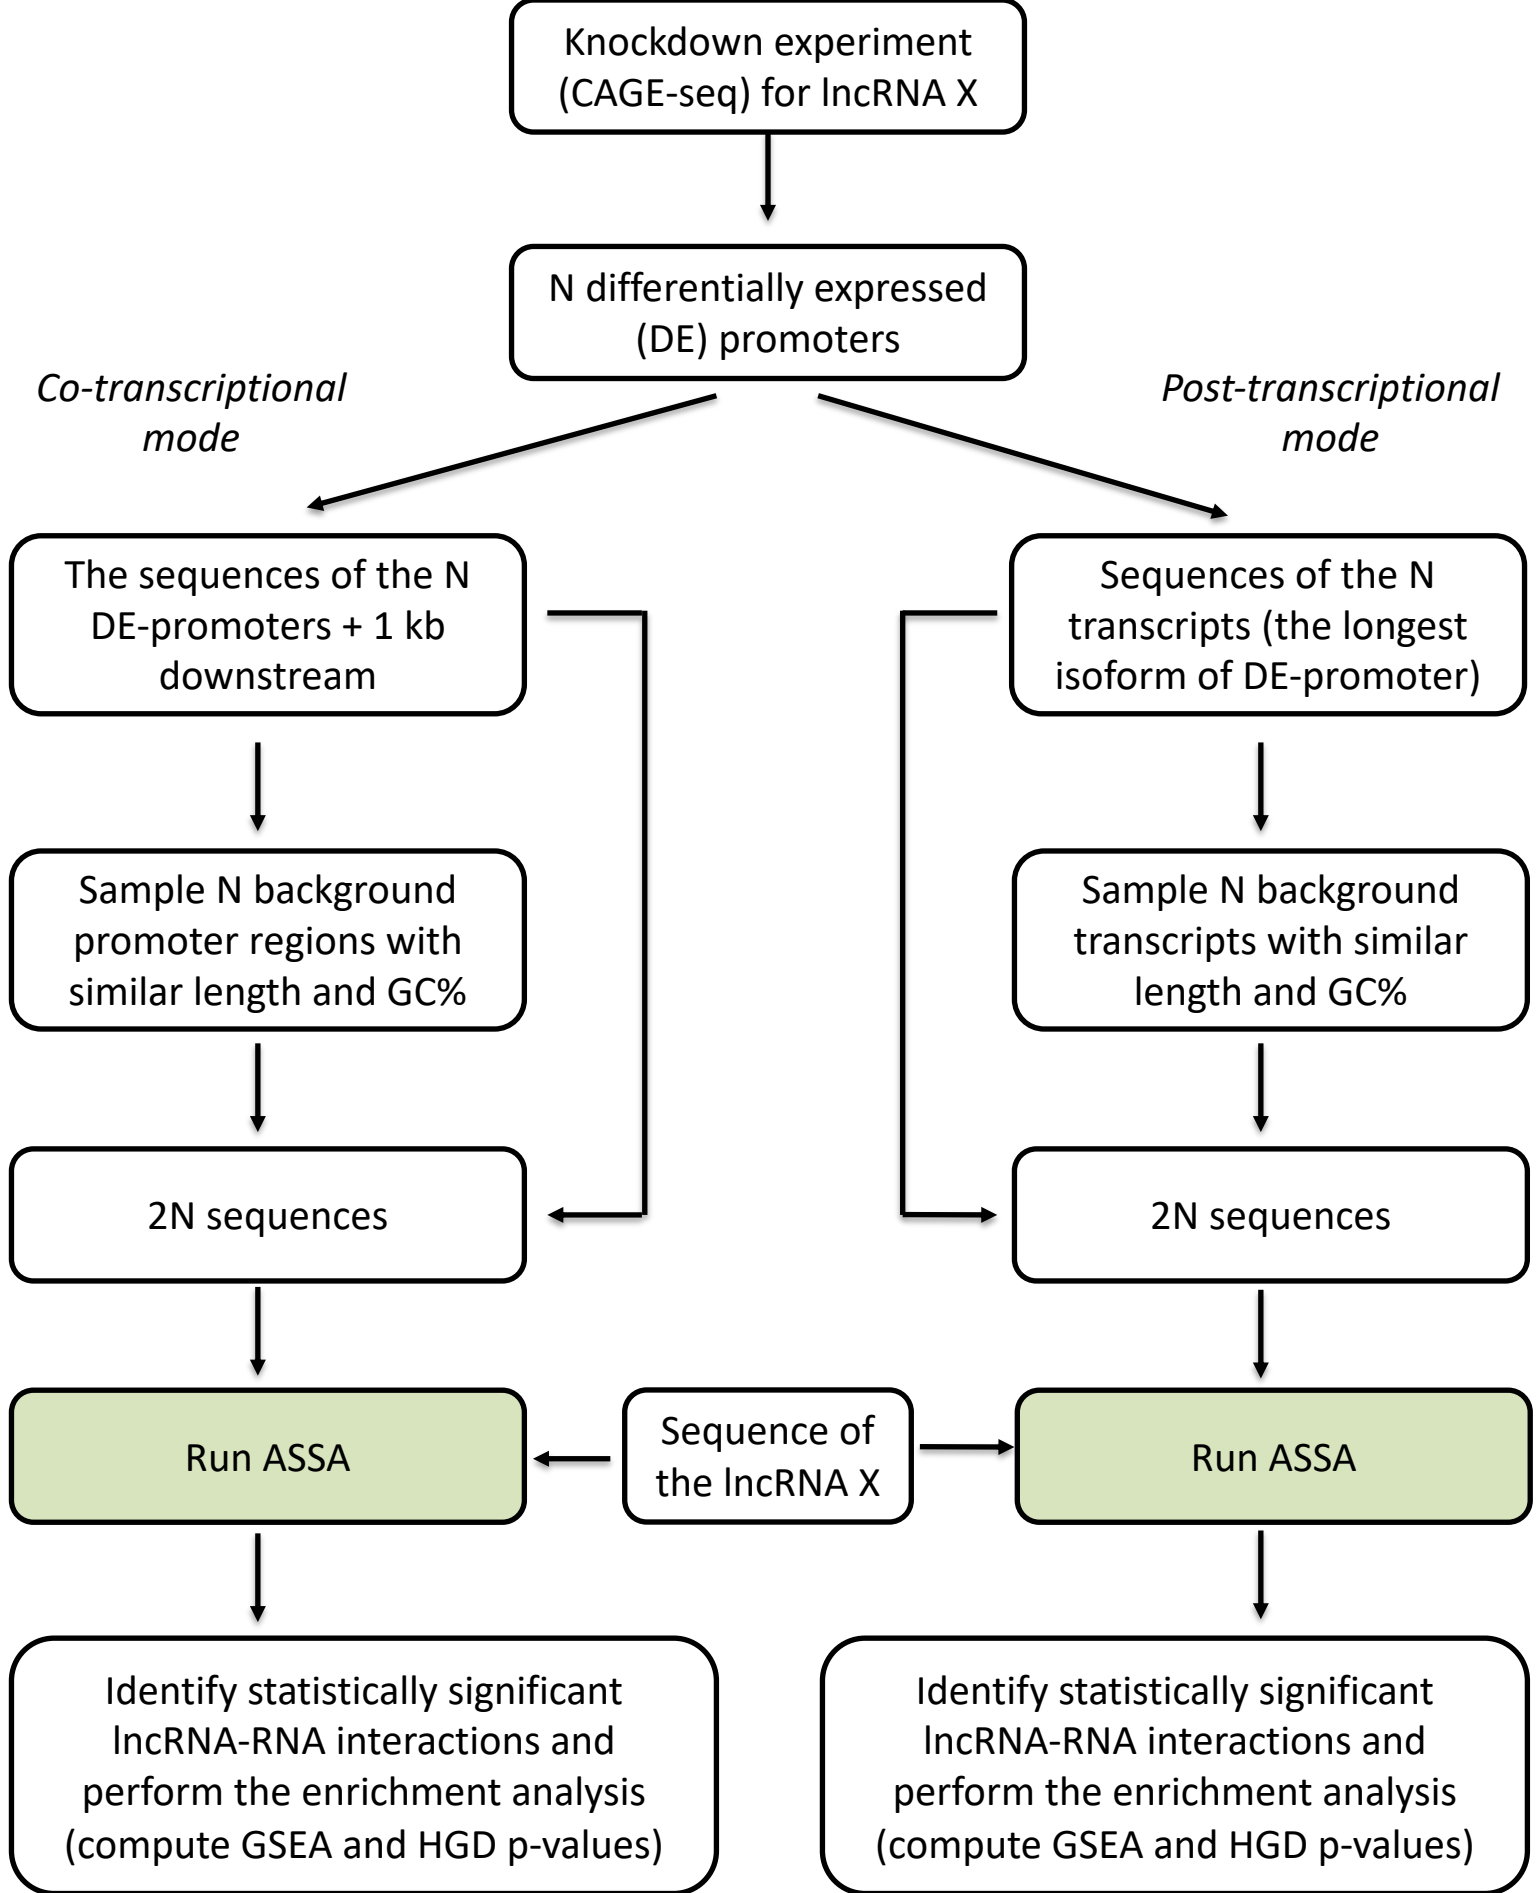

Supplement: s1 [file s1]

CHASERR  
(AC013394.2)  
lncRNA

CHD2

high gene  
expression

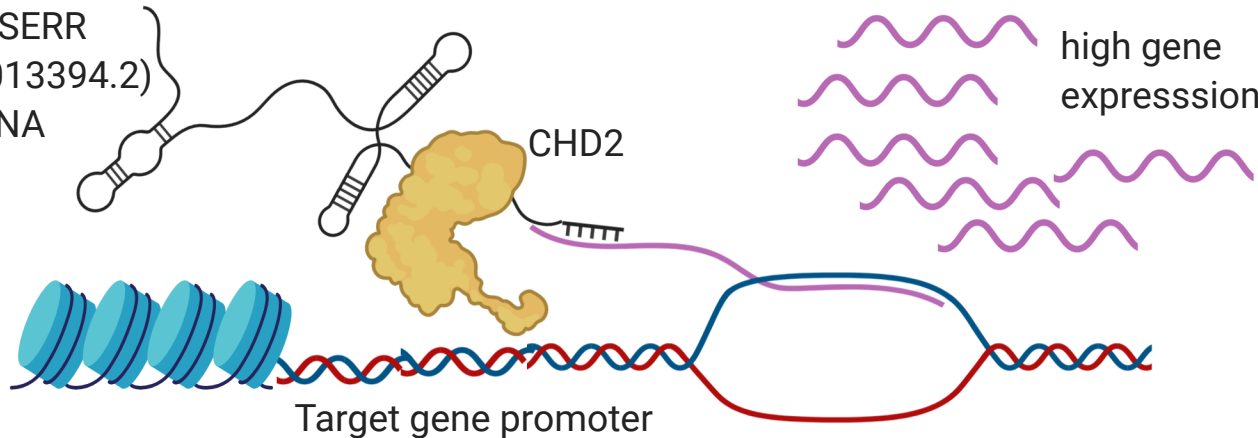

CHASERR  
knockdown /  
knockout

low gene  
expression

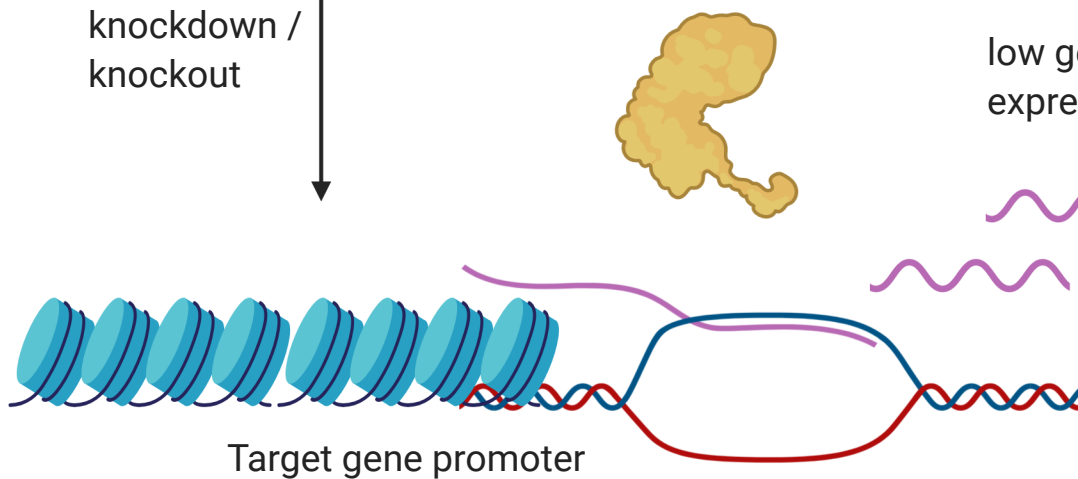

Supplement: s1 [file s1]

# 98 good ASOs

ASSA pvalue < 0.01

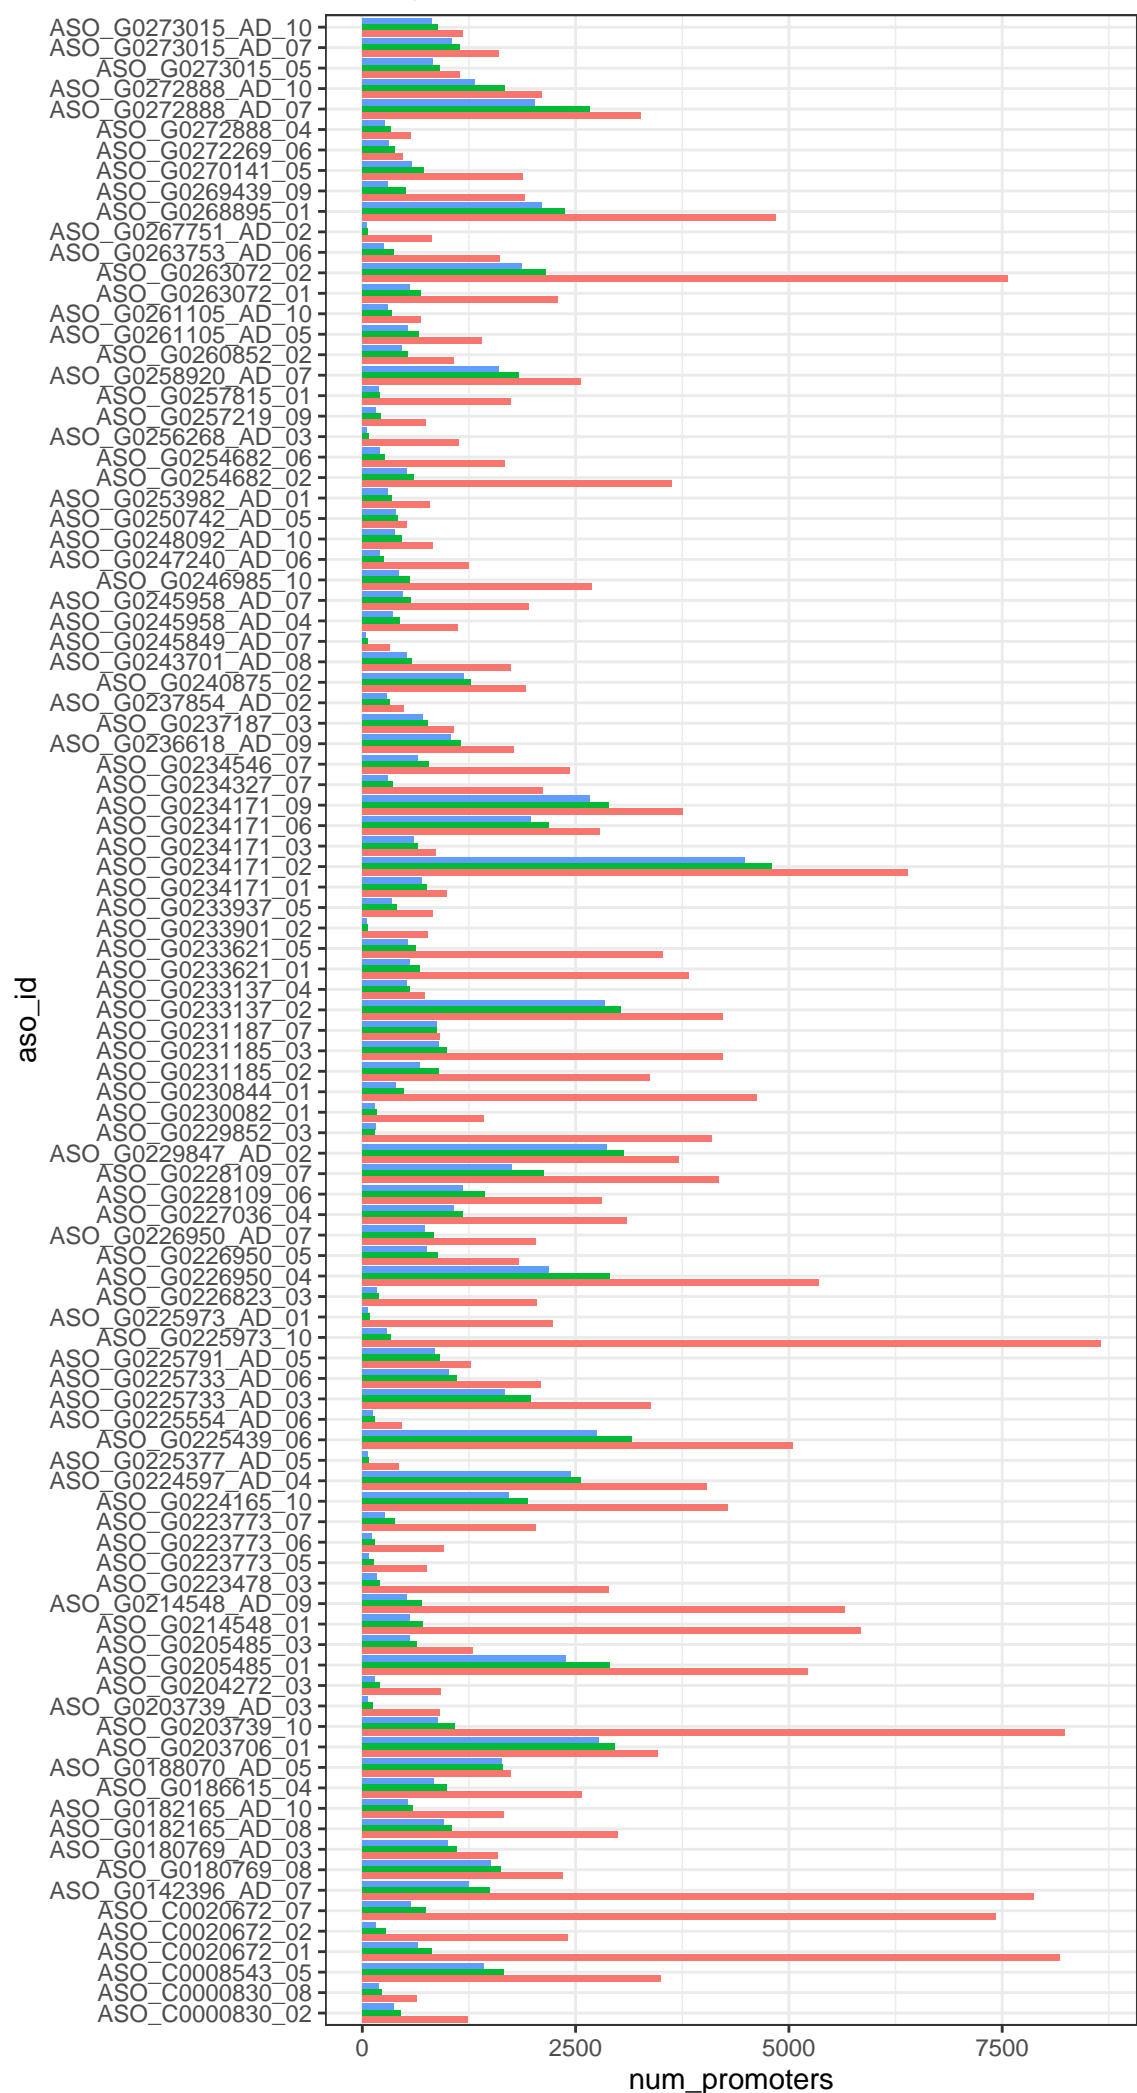

group

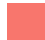

de\_trxs

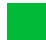

de\_and\_assa\_hit

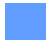

non\_de\_and\_assa\_hit

Supplement: s1 [file s1]

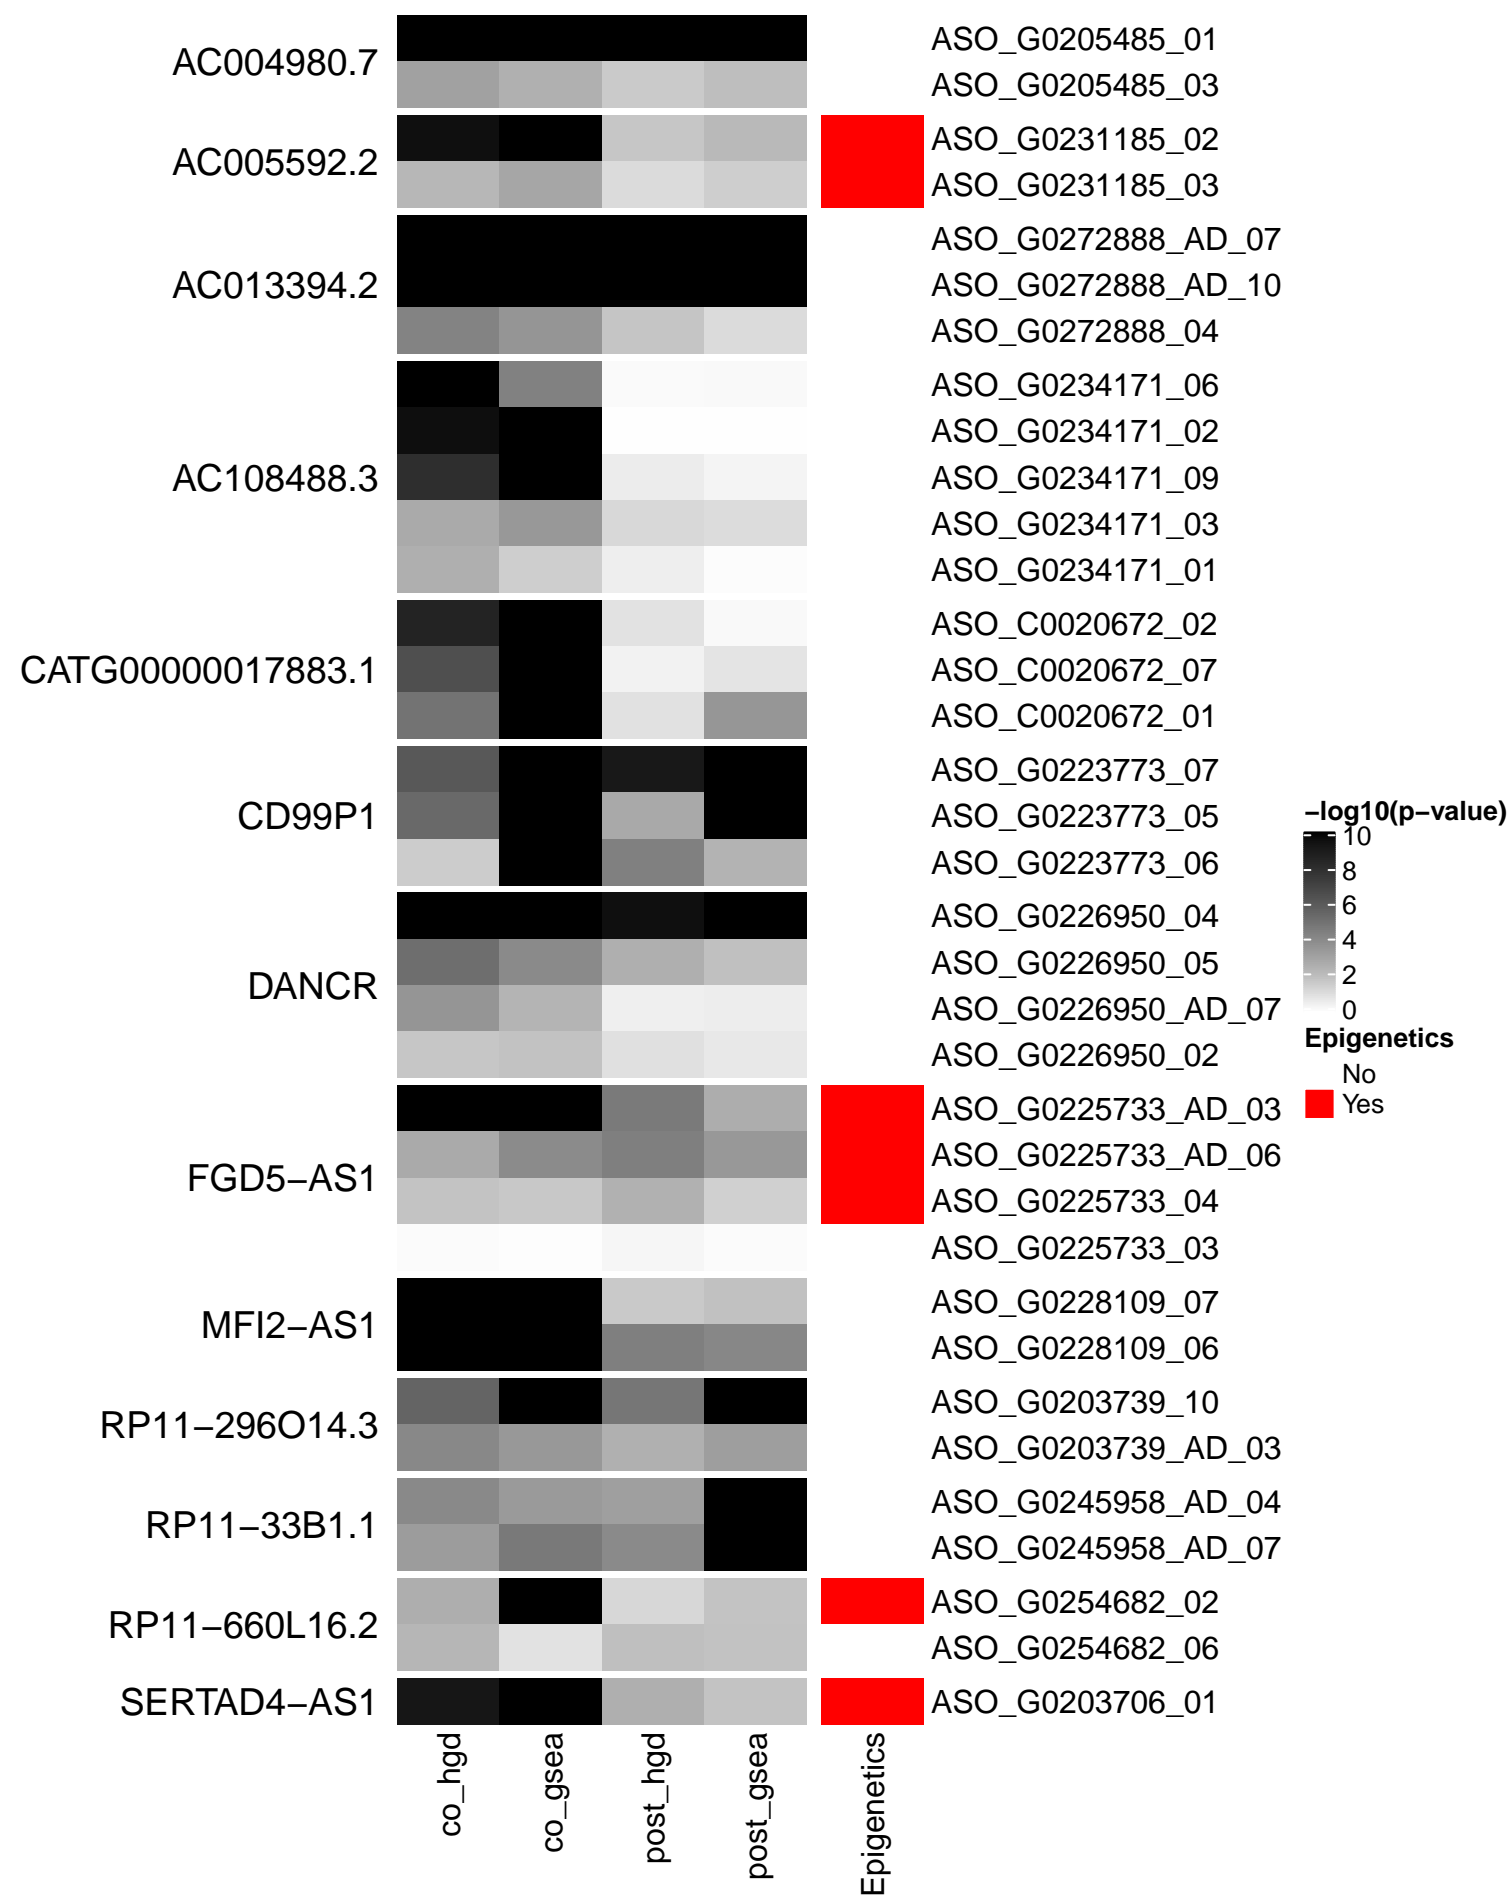

Supplement: s1 [file s1]

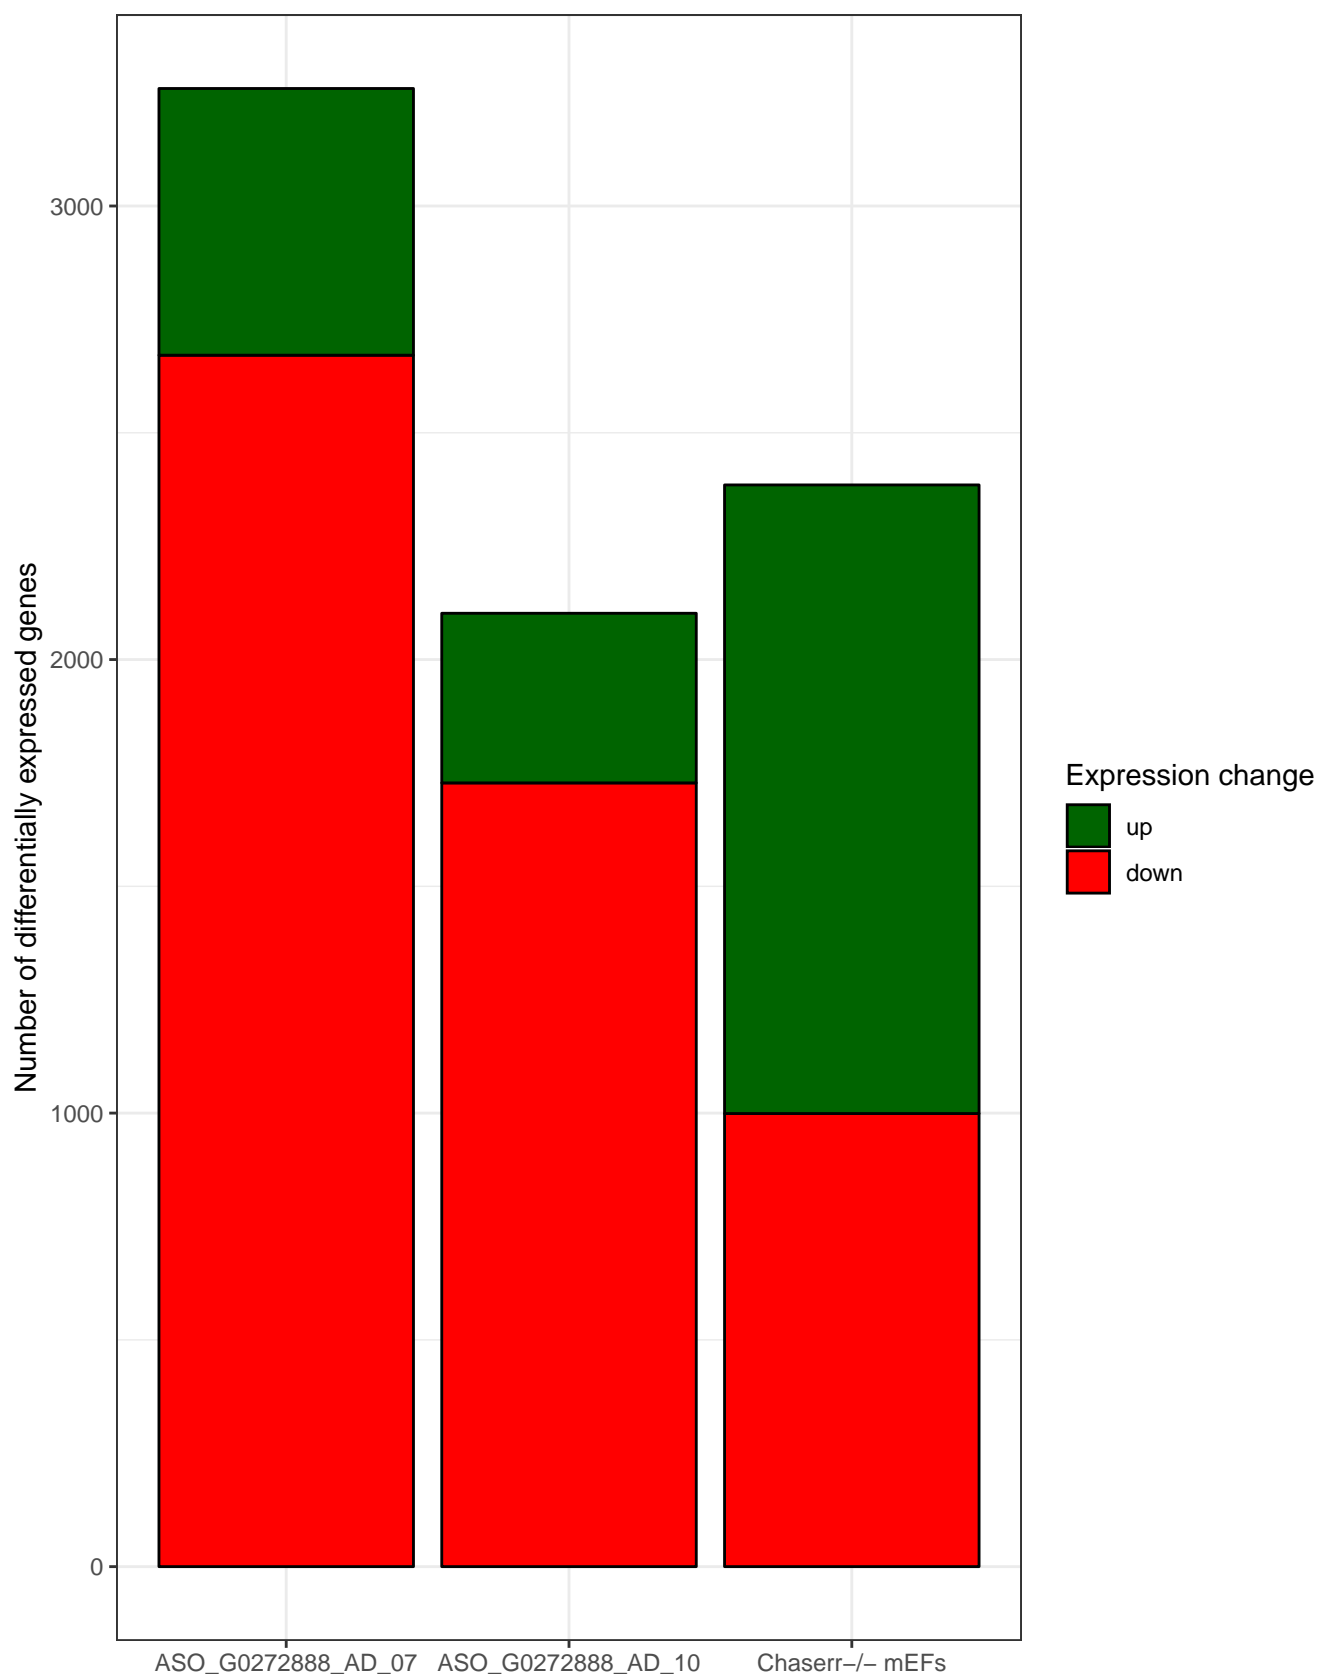

Supplement: s1 [file s1]

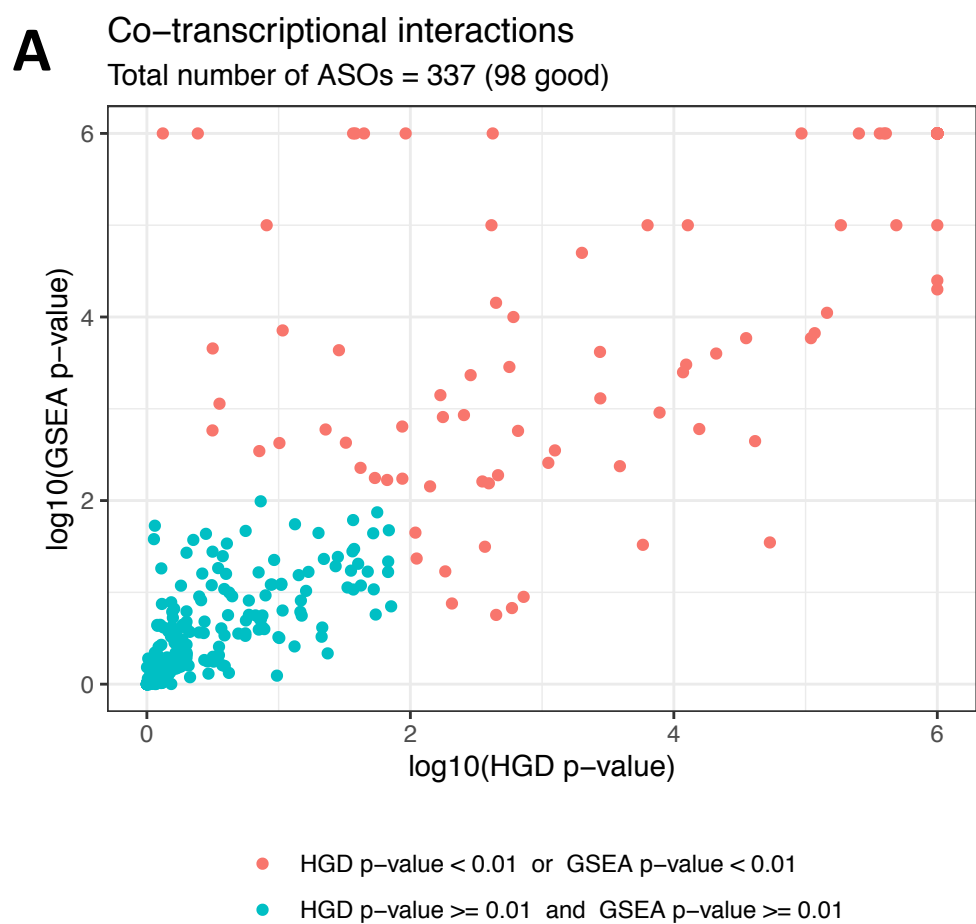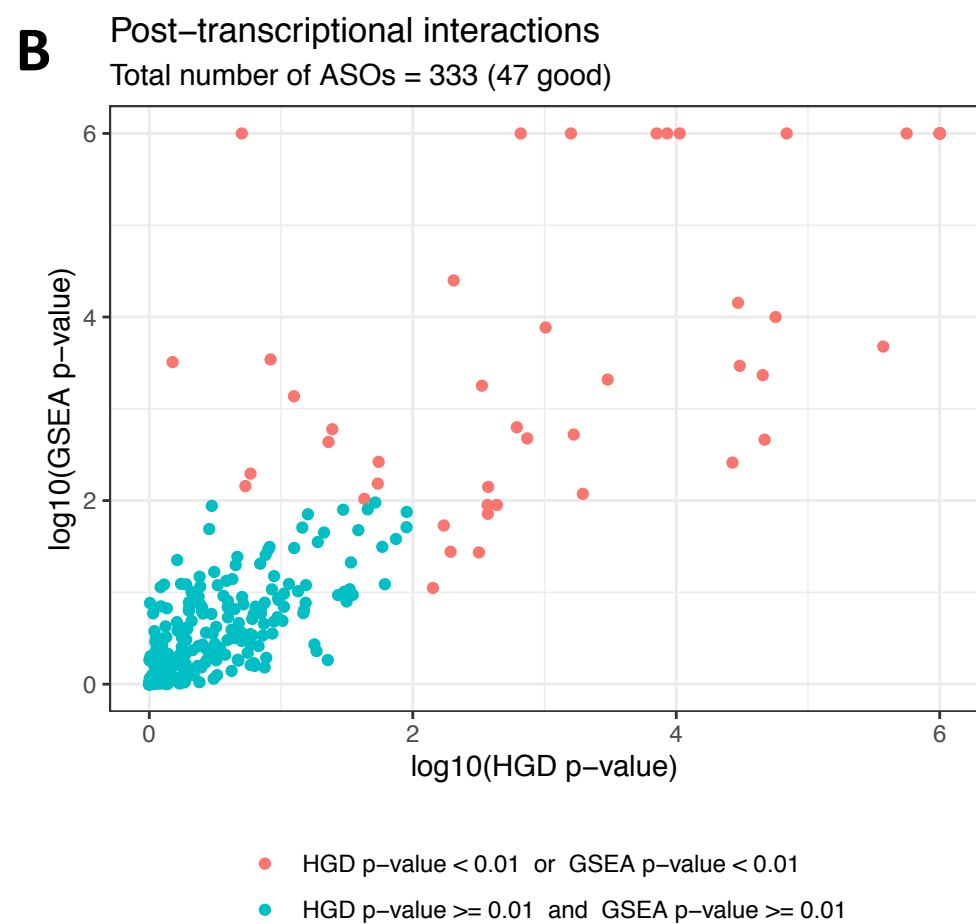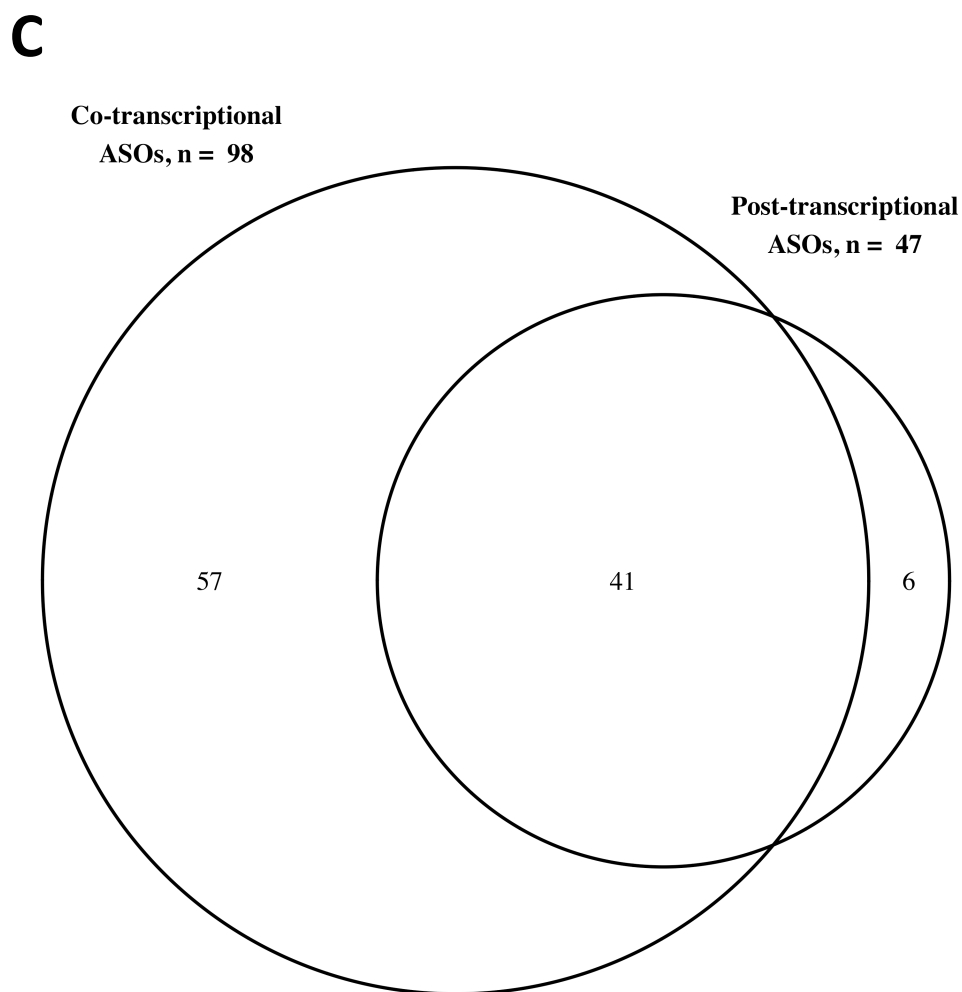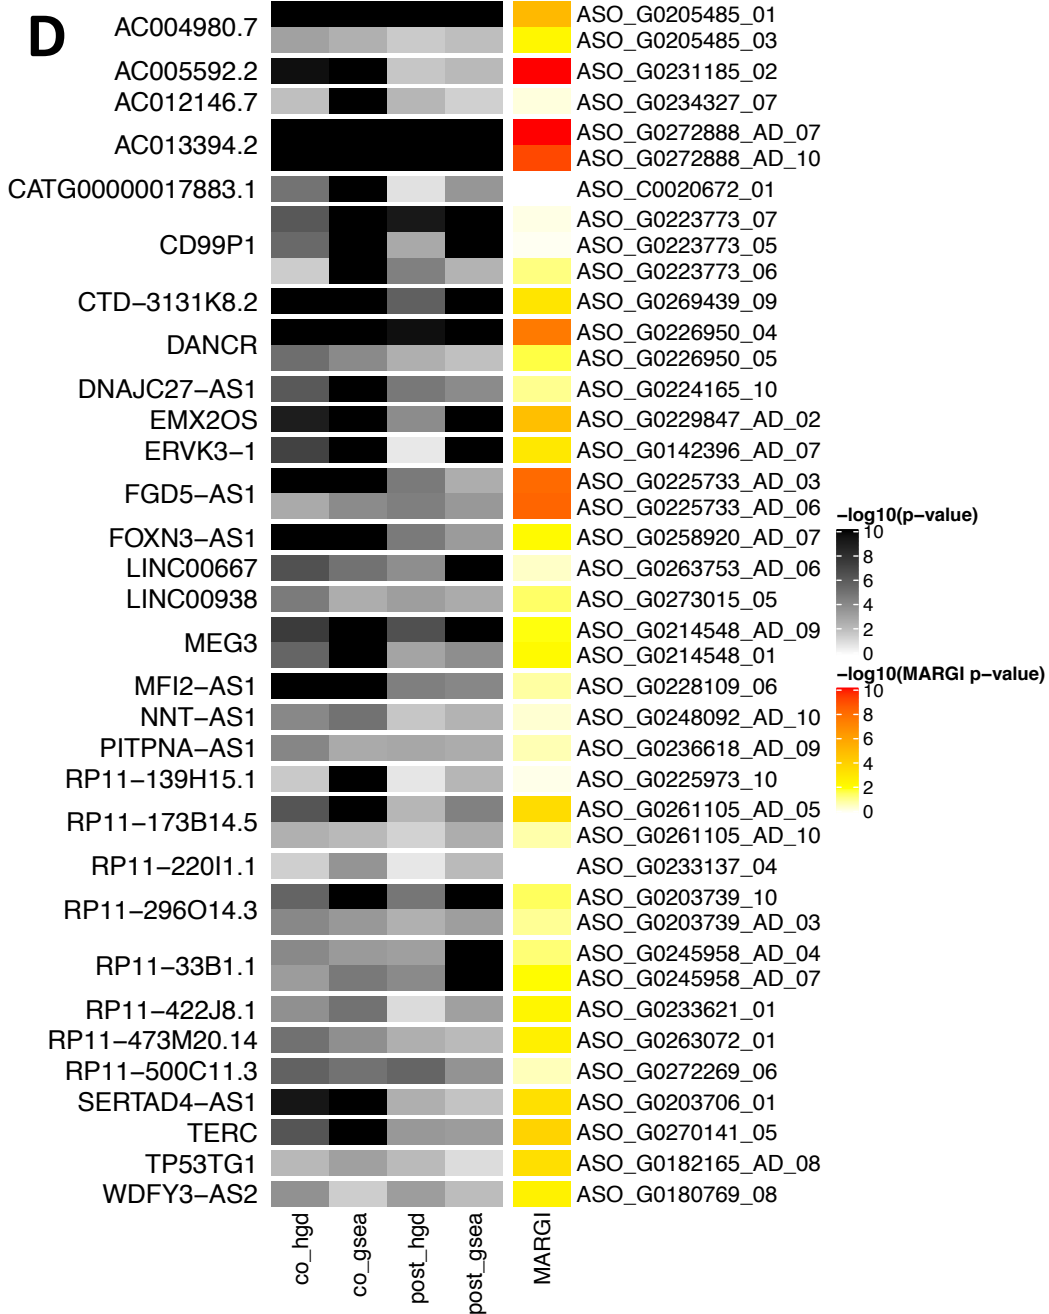

Supplement: s1 [file s1]

**A**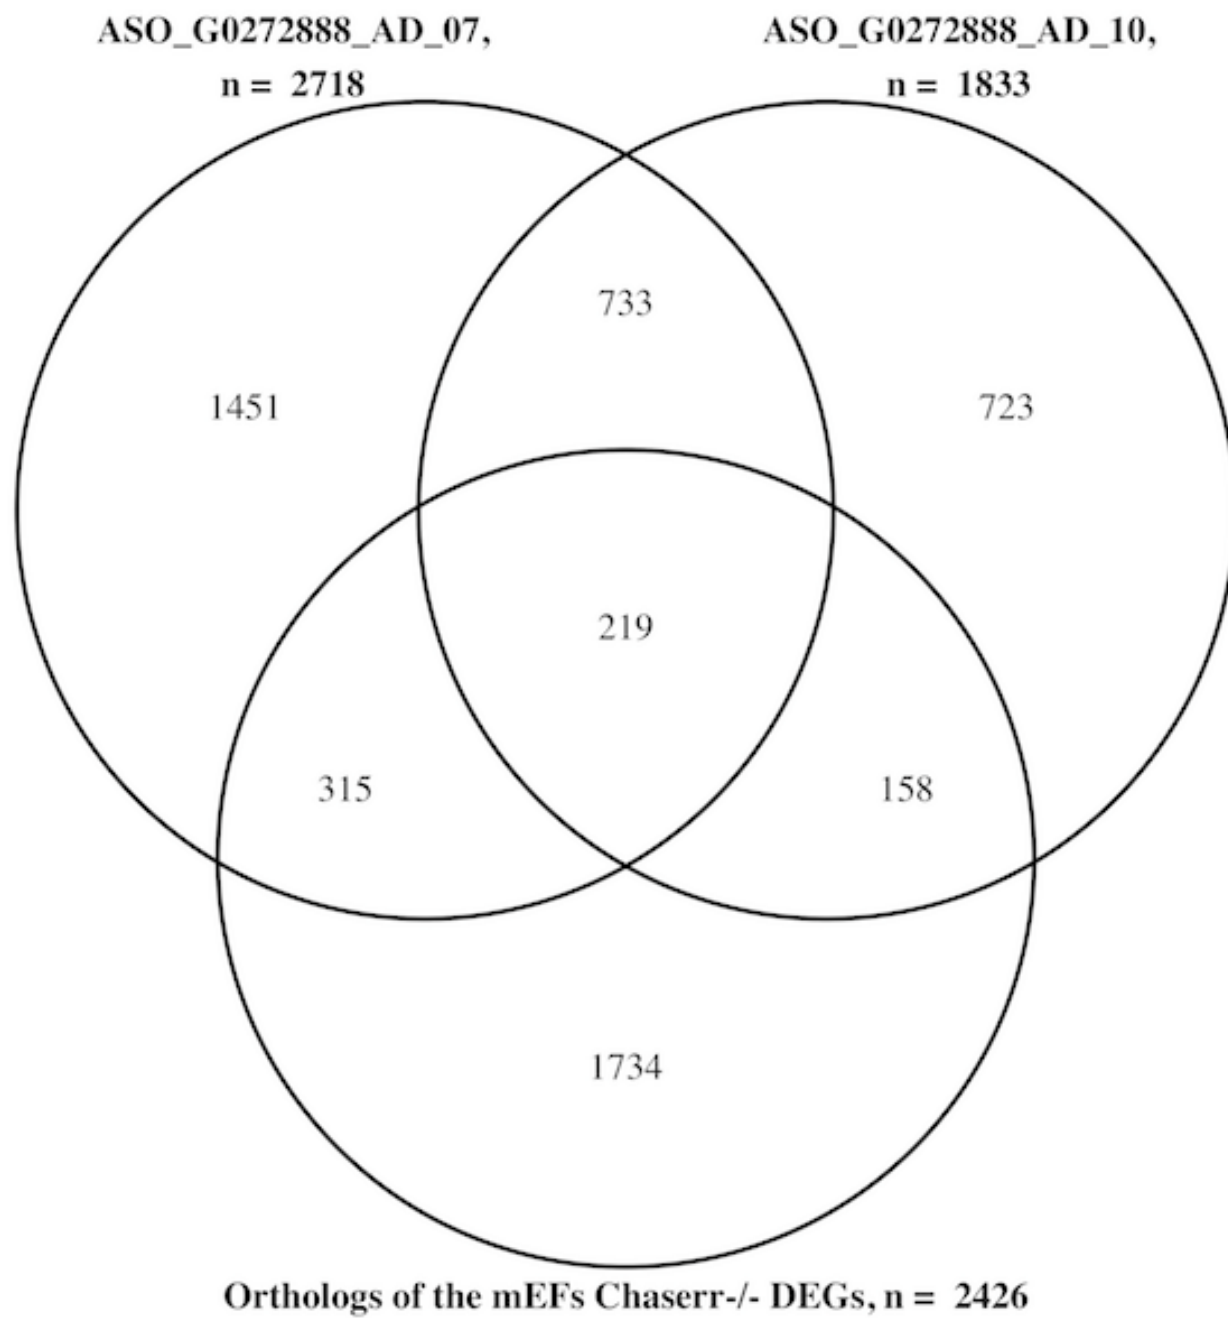**B**

219 common target genes

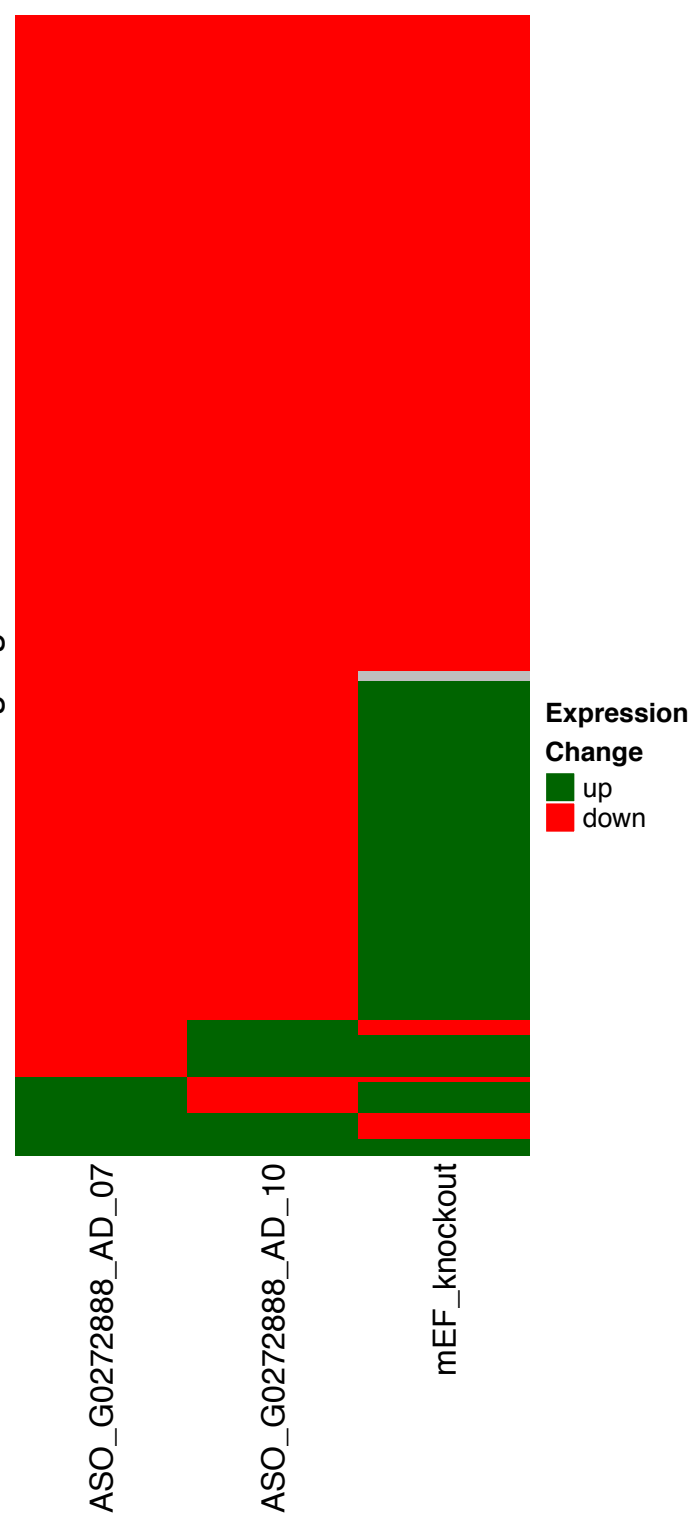

Supplement: s1 [file s1]

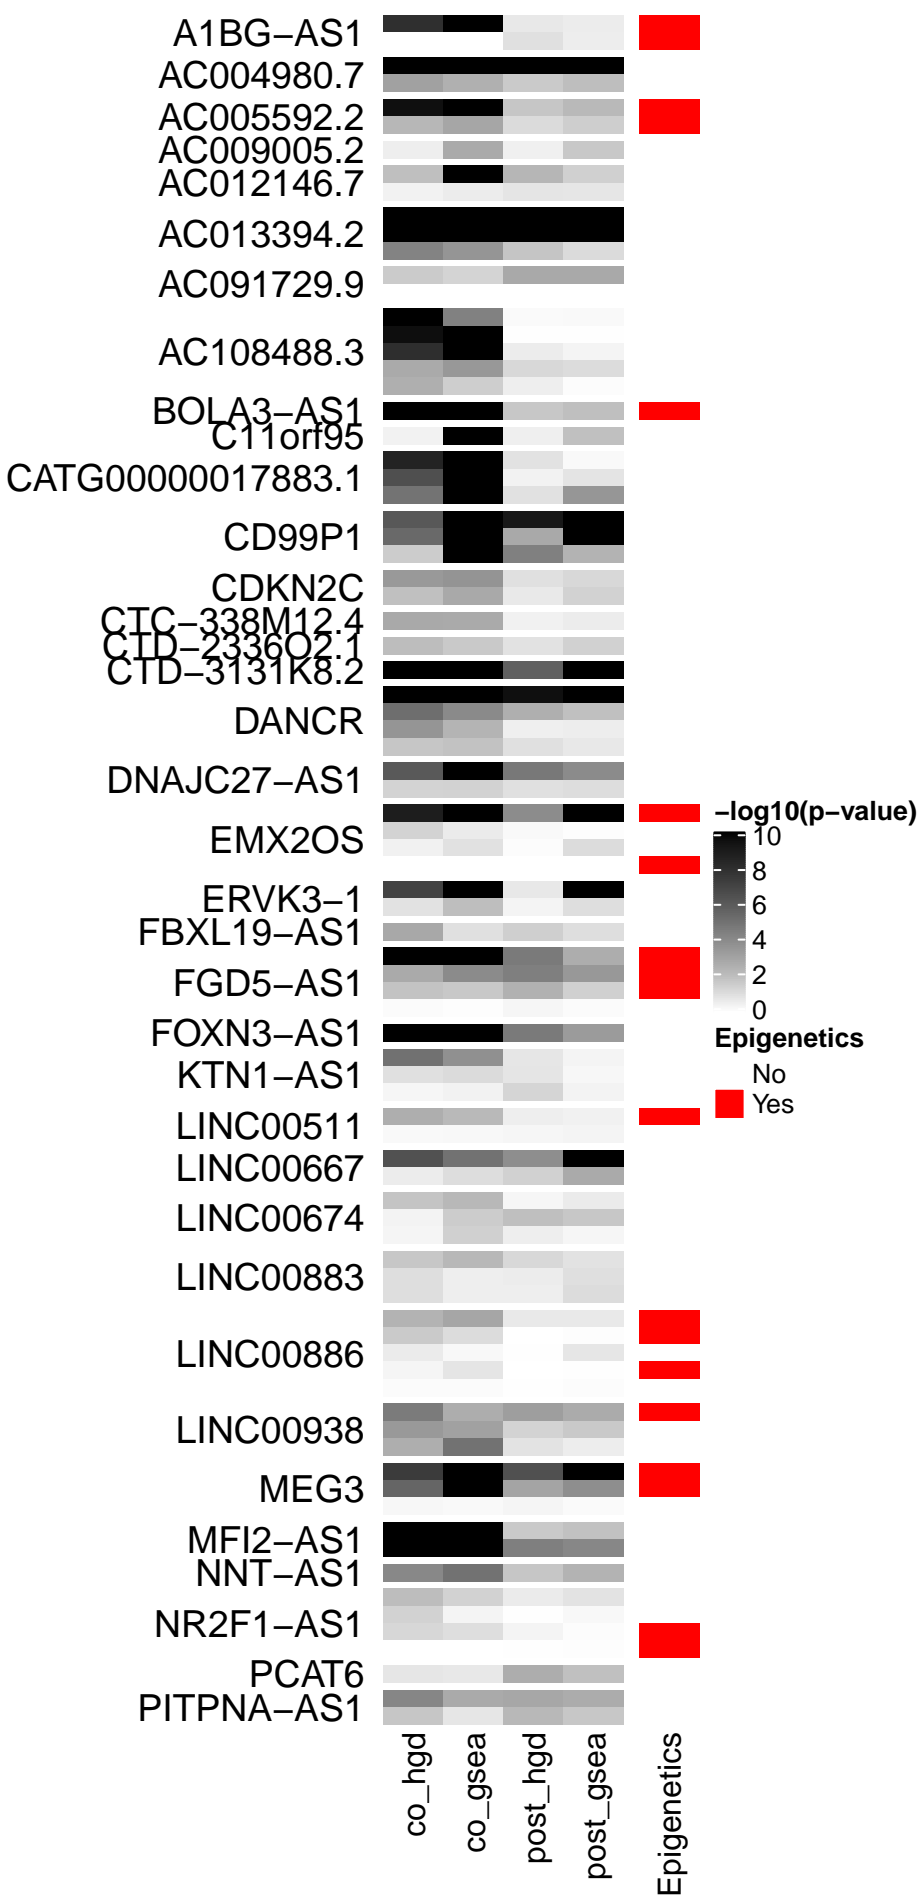

Supplement: s1 [file s1]

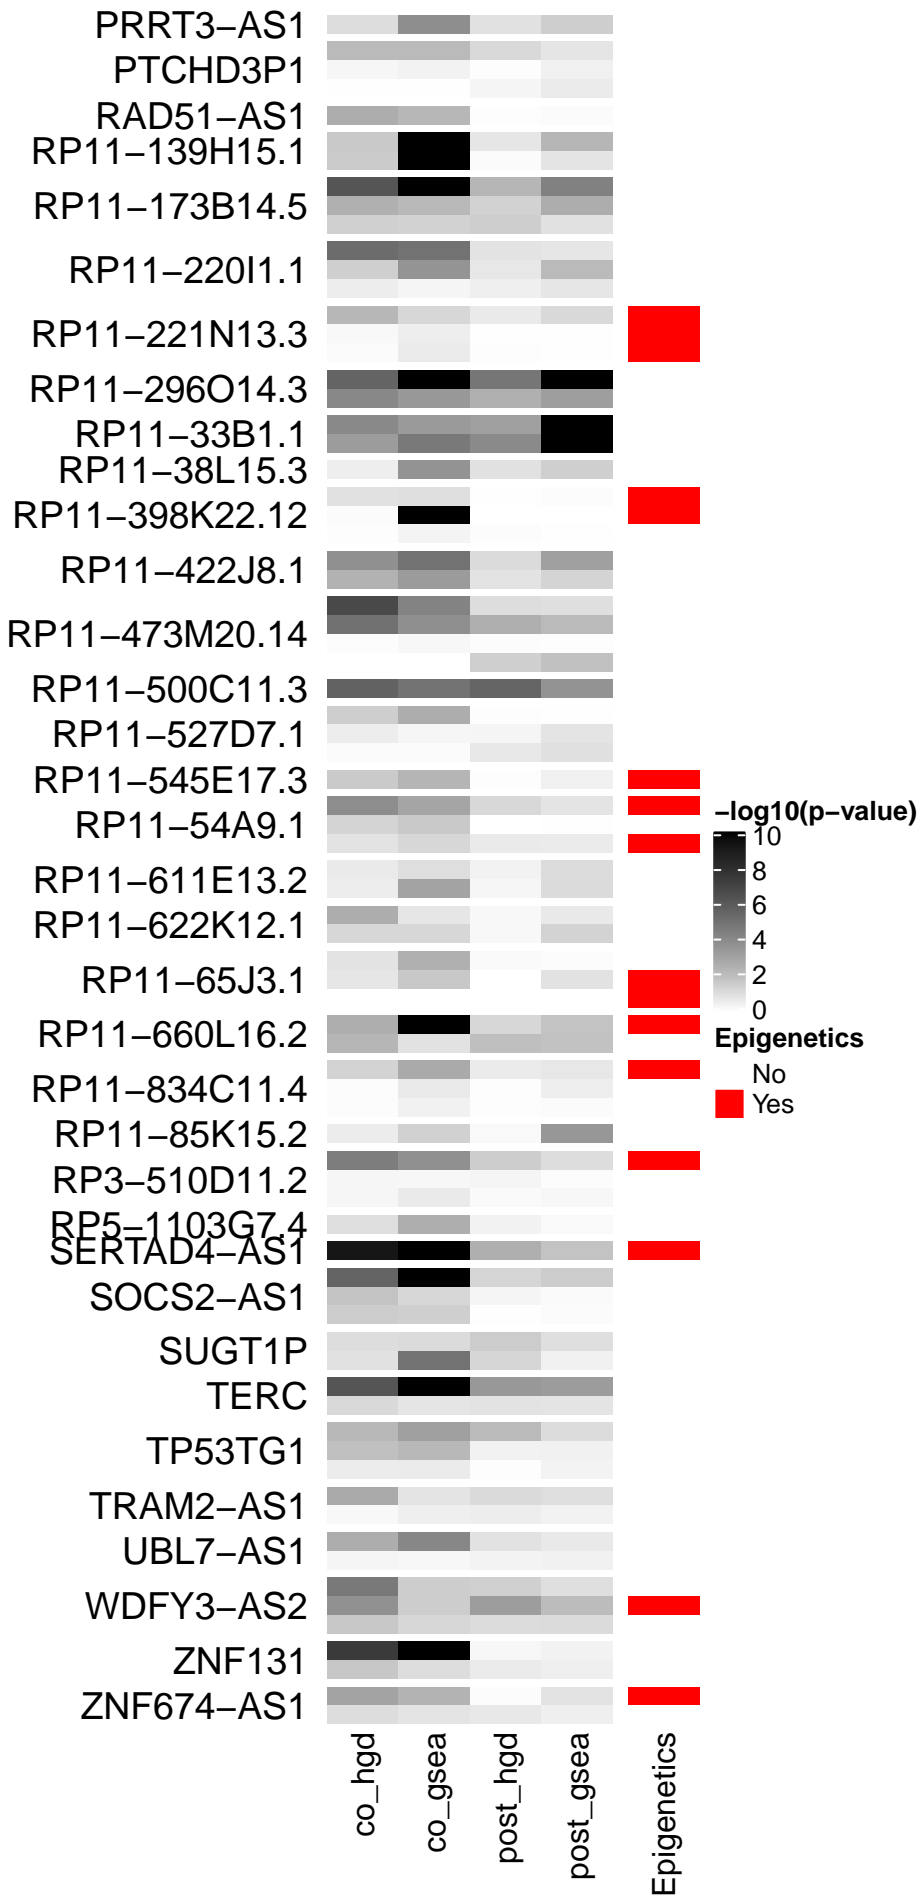

Supplement: s1 [file s1]

Expression change ■ up ■ down

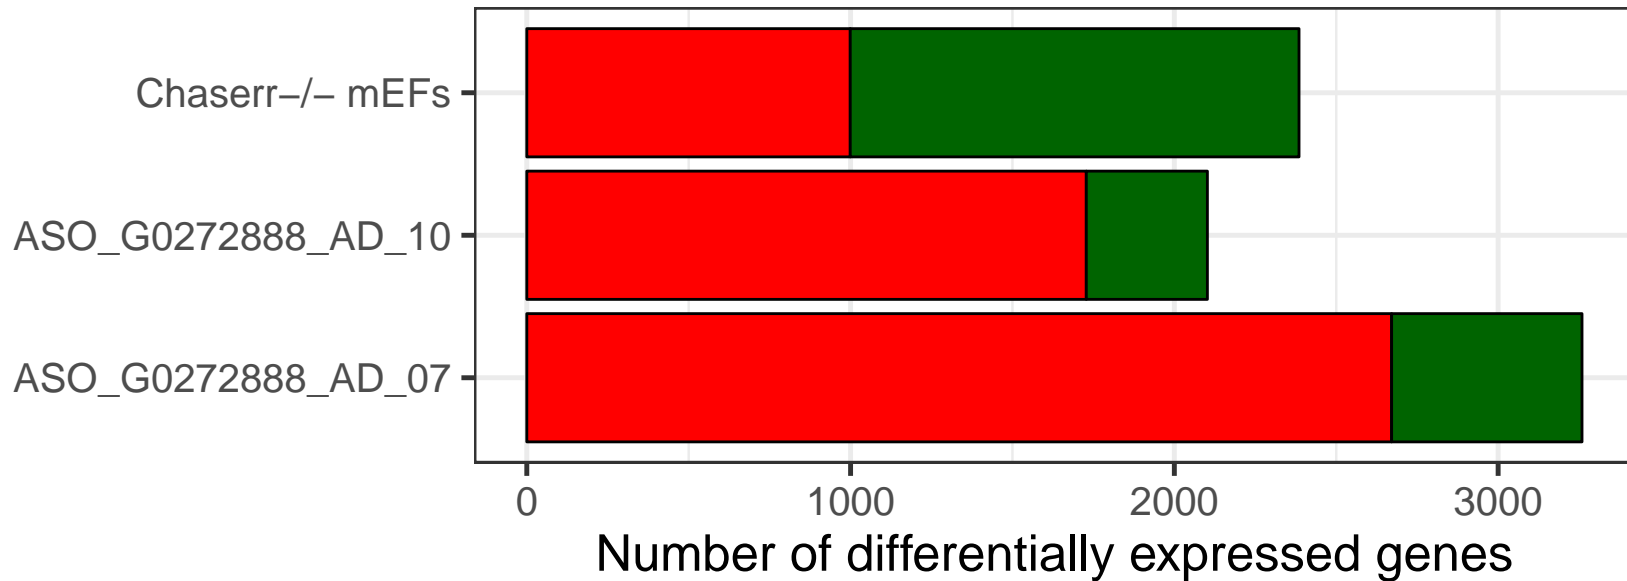

Supplement: s1 [file s1]

Total number of ASO = 348

Number of ASOs with  $\log_2FC < 0$  = 318

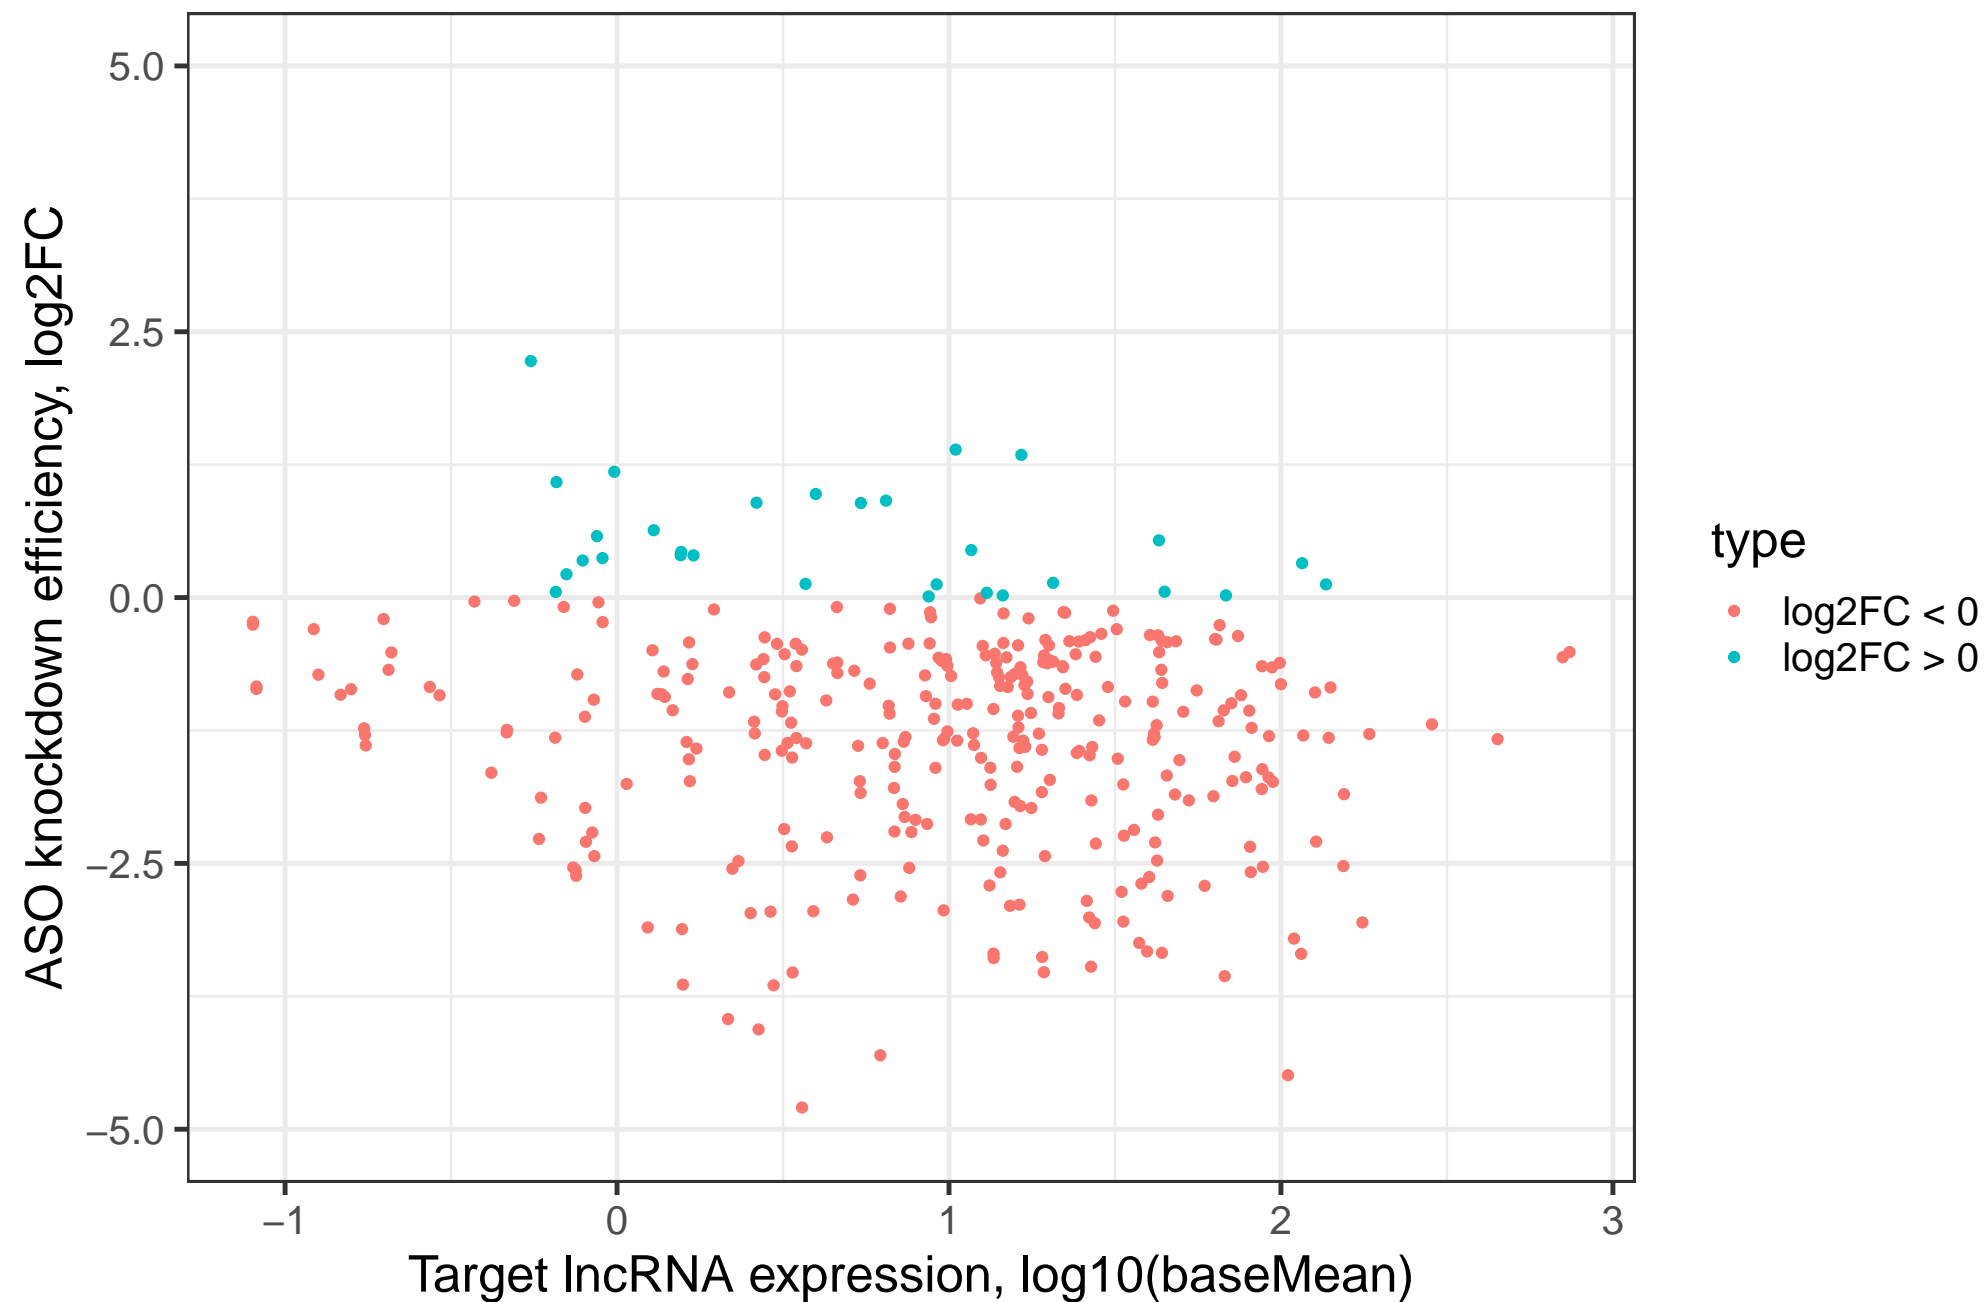

Supplement: s1 [file s1]

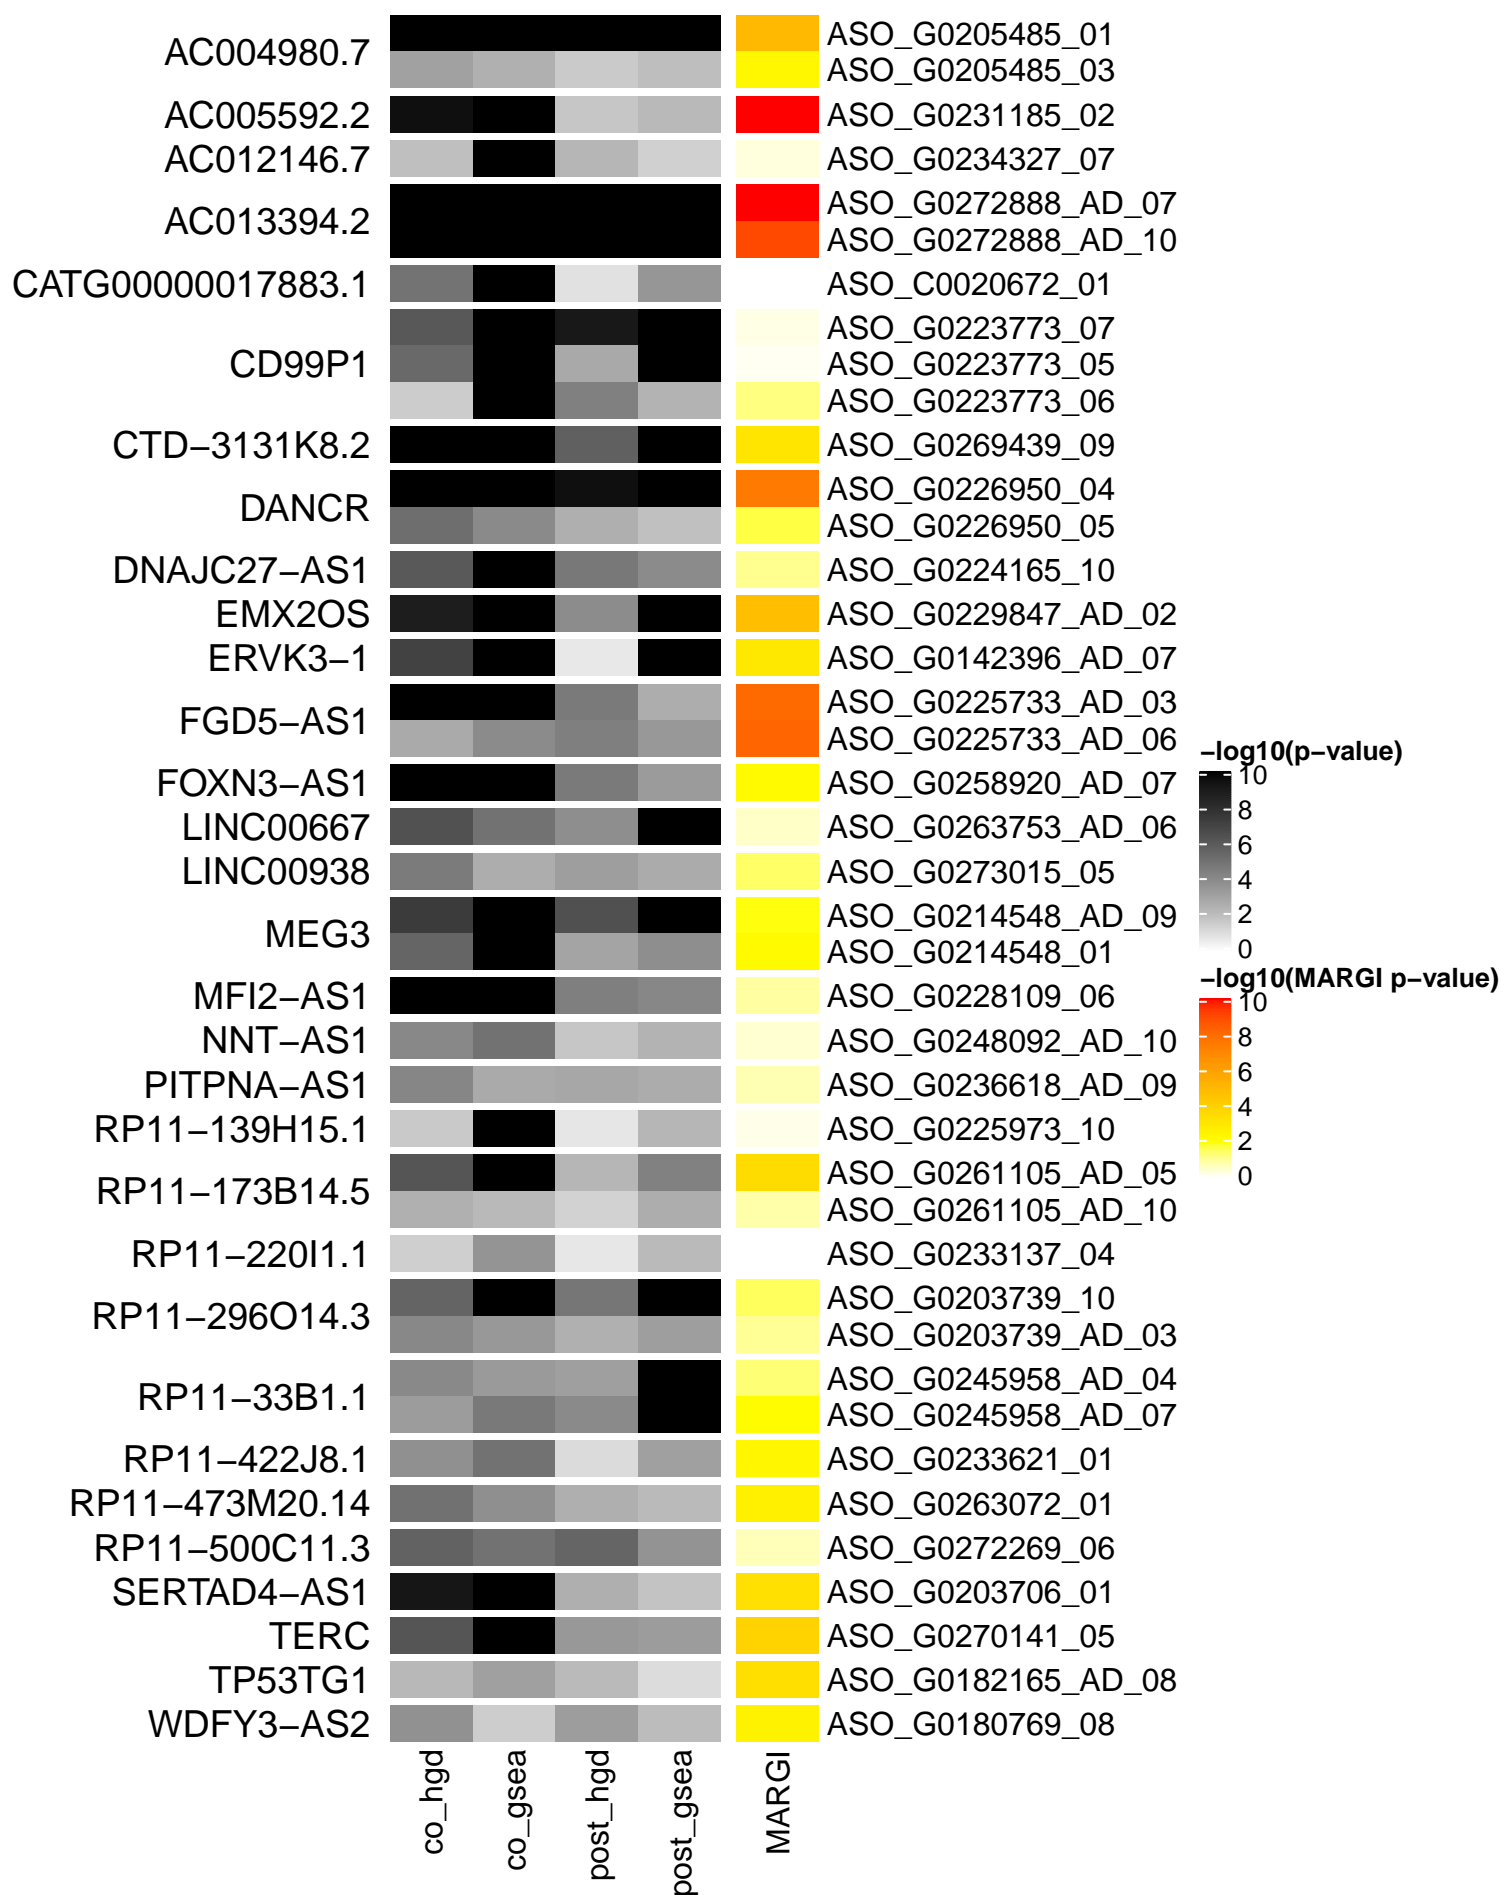

Supplement: s1 [file s1]

219 common target genes

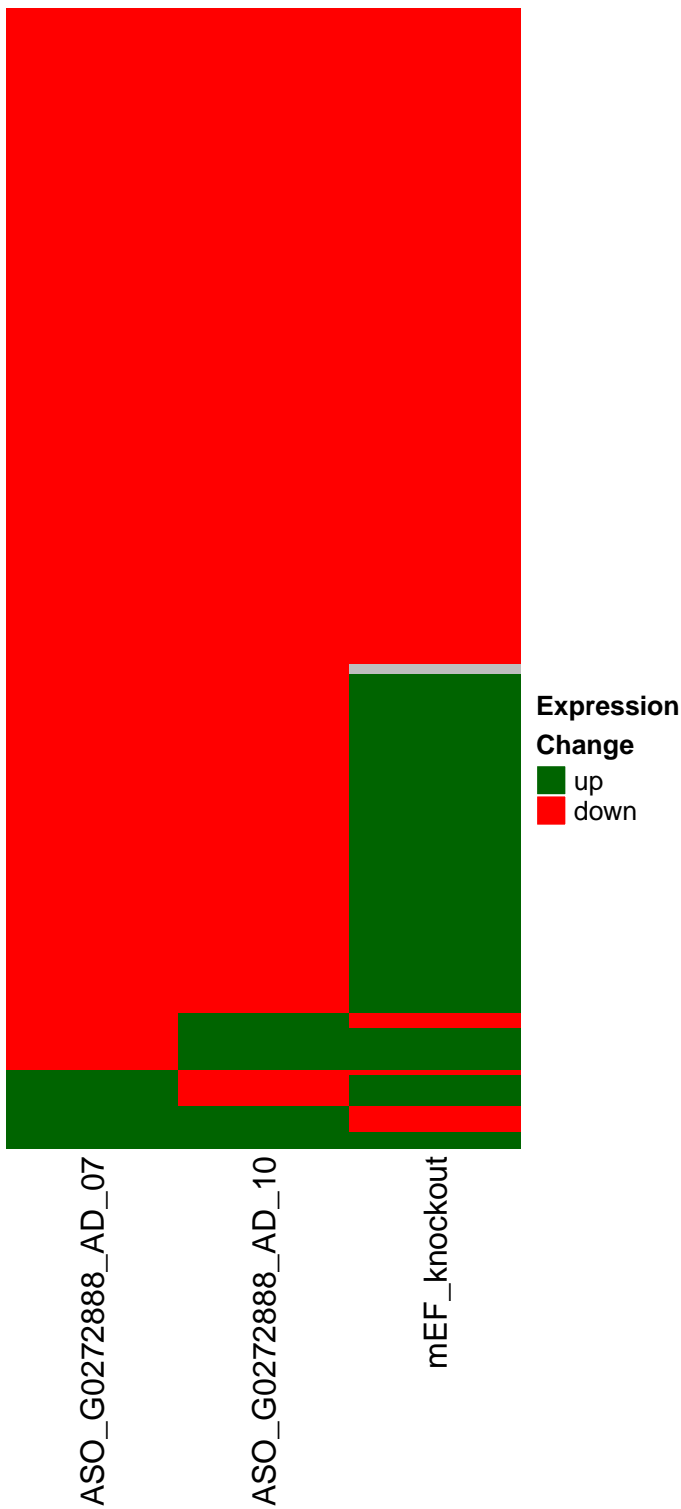

Supplement: s1 [file s1]

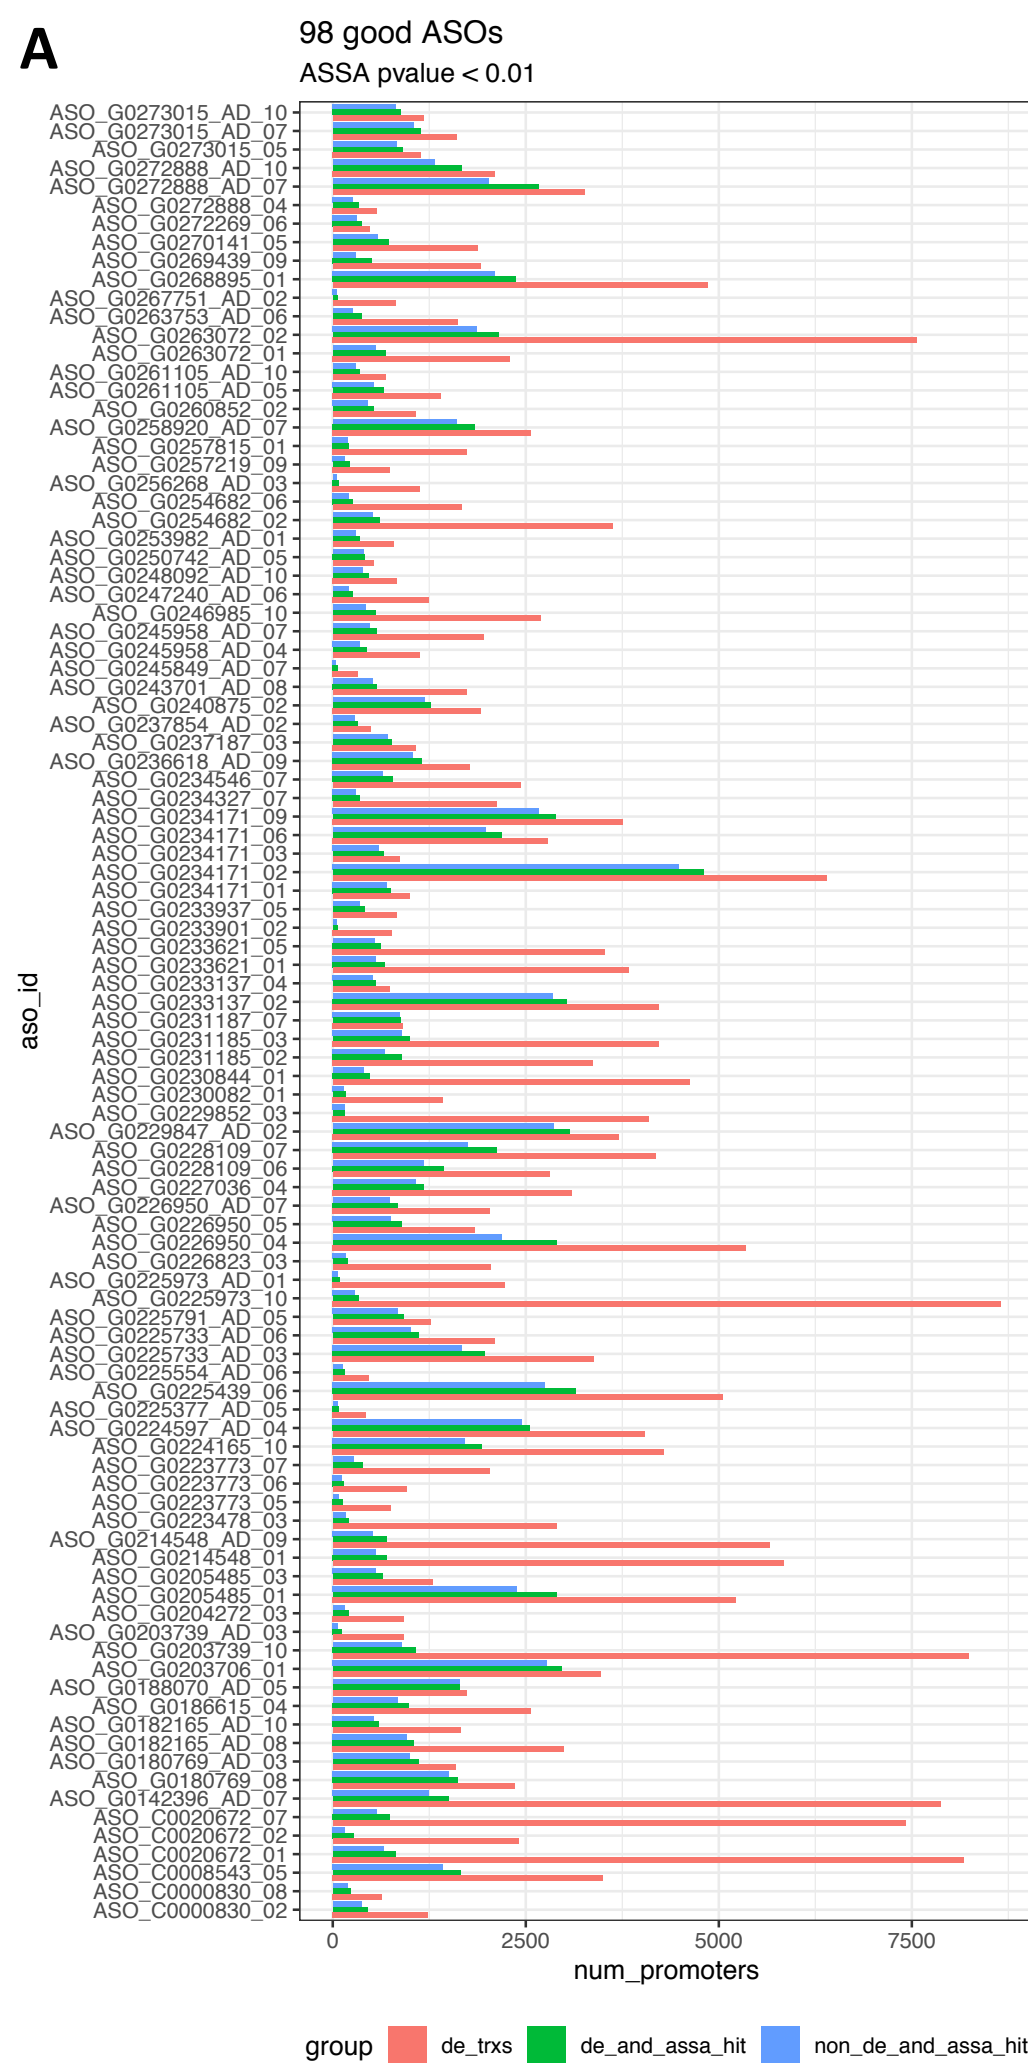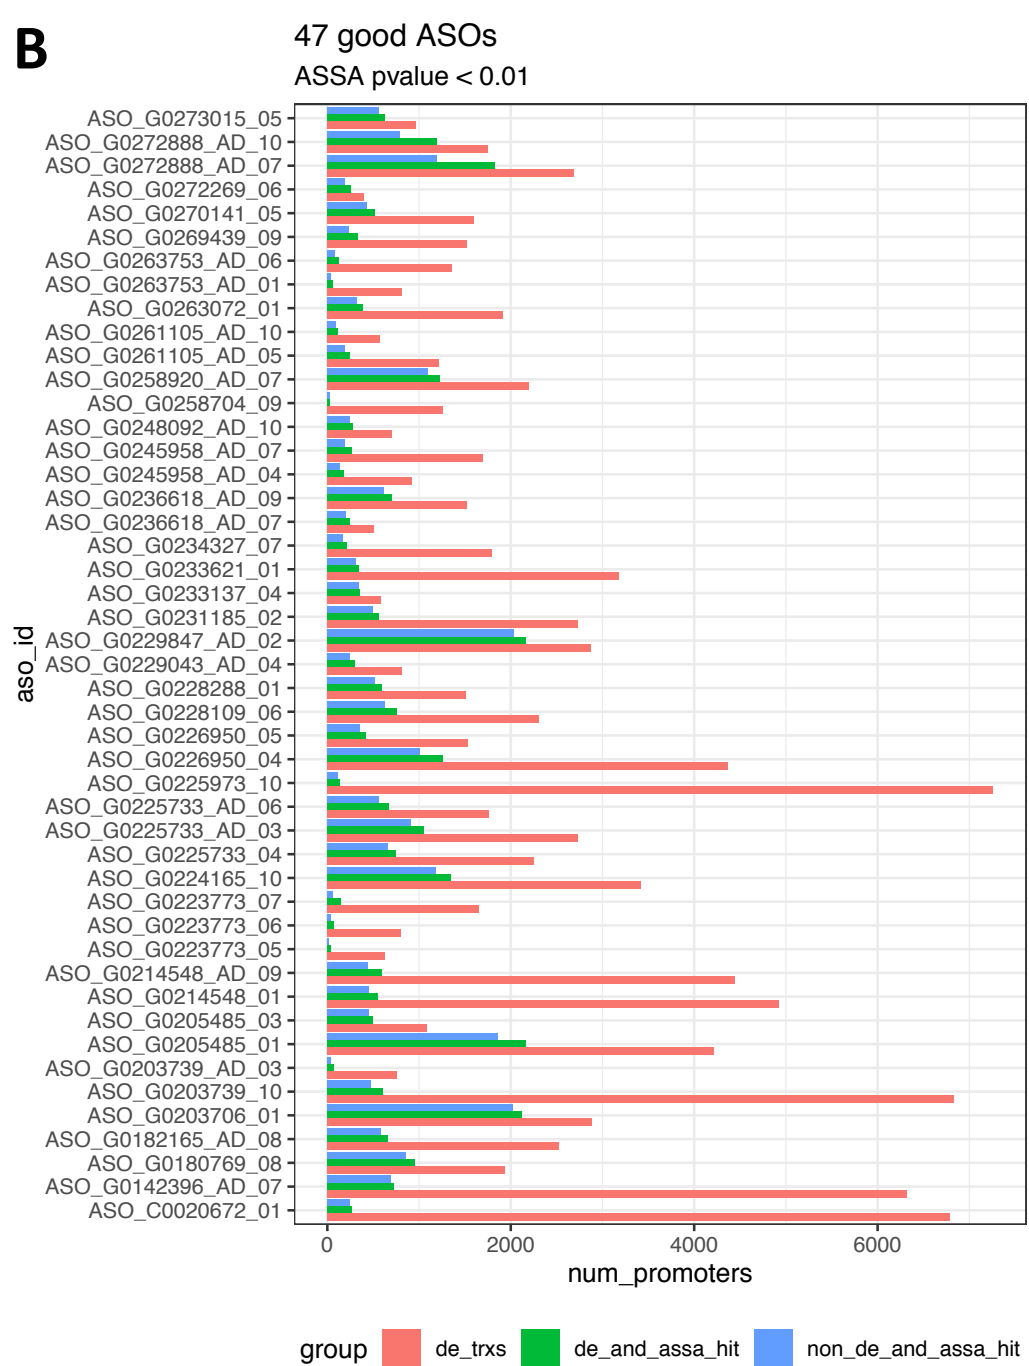

Supplement: s1 [file s1]
